# Supplementary material for: Metal-free synthesis of 3,5-disubstituted 1H- and 1-aryl-1H-pyrazoles from 1,3-diyne-indole derivatives employing two successive hydroaminations
Source: Royal Society of Chemistry journal article supplement (doi:10.1039/c4ra16439c), 2015-01-01
Supplement: c4ra16439c1.pdf [file c4ra16439c1.pdf]

# Metal-free synthesis of 3,5-disubstituted 1*H*- and 1-aryl-1*H*-pyrazoles from 1,3-diyne-indole derivatives employing two successive hydroaminations

Mariana M. Bassaco, Margiani P. Fortes,

Teodoro S. Kaufman\* and Claudio C. Silveira\*

## Supplementary Information

| Content                                                                            | Page N° |
|------------------------------------------------------------------------------------|---------|
| 1- General information                                                             | S2      |
| 2. Equipment                                                                       | S2      |
| 3. General procedure for the synthesis of the symmetric 1,3-diynes ( <b>1a-f</b> ) | S3      |
| 4. Characterization data of the symmetric 1,3-diynes ( <b>1a-f</b> )               | S3-S4   |
| 5. General procedure for the preparation of unsymmetric 1,3-diynes ( <b>3a-f</b> ) | S5      |
| 6. Characterization data of the unsymmetric 1,3-diynes ( <b>3a-f</b> )             | S5-S6   |
| 7. <sup>1</sup> H NMR and <sup>13</sup> C NMR spectra of compounds <b>2a-f</b>     | S7-S13  |
| 8. <sup>1</sup> H NMR and <sup>13</sup> C NMR spectra of compounds <b>4a-f</b>     | S14-S20 |
| 9. <sup>1</sup> H NMR and <sup>13</sup> C NMR spectra of compounds <b>5a-g</b>     | S21-S28 |
| 10. <sup>1</sup> H NMR and <sup>13</sup> C NMR spectra of compounds <b>6a-g</b>    | S29-S35 |

\* Corresponding authors. Tel.: + 55-55-32208754; E-mail: silveira@quimica.ufsm.br (Claudio C. Silveira); kaufman@iquir-conicet.gov.ar (Teodoro S. Kaufman)

**General information:** PEG-400 and other commercial reagents were used without further purification. In the conventional purification procedure, the crude material was submitted to flash column chromatography with silica gel 60 H (particle size 40-63  $\mu$ m, 230-400 mesh), eluting isocratically with mixtures of hexane:EtOAc.

All new compounds gave single spots when run on TLC plates of Kieselgel 60 GF<sub>254</sub>, employing different hexane-EtOAc solvent systems. Chromatographic spots were detected by irradiation of the plates with UV light (254 nm), followed by exposure to iodine vapors or by spraying with ethanolic vanillin/sulfuric acid reagent and careful heating.

**Equipment:** The melting points were measured on an MQAPF-301 (Microquímica) instrument and are reported uncorrected. The infrared spectra were acquired on a Shimadzu Prestige-21 spectrometer, with the samples prepared as KBr pellets or thin films held between NaCl disks. The NMR spectra (<sup>1</sup>H and <sup>13</sup>C) were recorded in CDCl<sub>3</sub> unless otherwise noted, on Bruker DPX-400 and Bruker DPX-600 spectrometers (400 and 600 MHz for <sup>1</sup>H, respectively). Chemical shift data are reported in ppm downfield from TMS, employed as internal standard. Coupling constants (*J*) are informed in Hertz. Elemental analyses were recorded on a Perkin-Elmer CHN 2400 analyzer. The low resolution mass spectra were acquired on a Shimadzu QP2010 *Plus* CG-MS instrument. High-resolution mass spectral data were obtained in a Bruker microTOF-Q II instrument. Detection of the ions was performed with electrospray ionization in positive ion mode.

### General procedure for the synthesis of the symmetric 1,3-diynes (1a-f)

A stirred mixture of the heterocyclic *N*-propargyl derivative (5 mmol) and CuCl (25 mg, 0.25 mmol, 5 mol%) in DMSO (5 mL) was heated to 90 °C for 4 h. Then, the reaction was cooled to room temperature and filtered through Celite. The filtrate was diluted with water (15 mL) and extracted with EtOAc (4 × 25 mL). The combined extracts were successively washed with water (1 × 10 mL) and brine (1 × 10 mL). The organic layer was dried over MgSO<sub>4</sub>, and concentrated under reduced pressure. The product was purified by column chromatography using an hexane: EtOAc:CH<sub>2</sub>Cl<sub>2</sub> (80:10:10) solvent mixture as eluent.

#### 1,6-Bis(1*H*-indol-1-yl)hexa-2,4-diyne (1a)

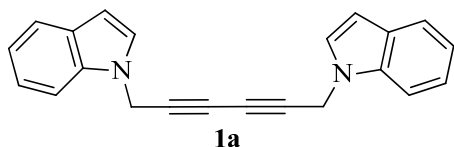

Light brown solid, m.p.: 147-149 °C; yield: 83%. <sup>1</sup>H NMR (400 MHz) δ: 4.84 (s, 4H), 6.49 (d, *J* = 3.1, 2H), 7.07 (d, *J* = 3.1, 2H), 7.10-7.13 (m, 2H), 7.19-7.23 (m, 2H), 7.31 (d, *J* = 8.2, 2H) and 7.60 (d, *J* = 7.9, 2H). <sup>13</sup>C NMR (100 MHz) δ: 36.3, 69.0, 73.3, 102.5, 109.2, 120.0, 121.1, 122.1, 127.2, 128.9 and 135.8. IR (KBr, ν): 3104, 2904, 1614, 1463, 1333, 1315, 1185, 739 and 719 cm<sup>-1</sup>. MS (*m/z*, rel. int., %): 309 [12, (M+1)<sup>+</sup>], 308 (51, M<sup>+</sup>), 281 (28), 253 (17), 209 (14), 208 (21), 207 (100), 191 (100), 133 (15), 117 (38), 89 (24) and 73 (27). HRMS (ESI-TOF, *m/z*): Obsd. 331.1208; C<sub>22</sub>H<sub>16</sub>N<sub>2</sub>Na [(M+Na)<sup>+</sup>] requires 331.1211.

#### 1,6-Bis(5-methoxy-1*H*-indol-1-yl)hexa-2,4-diyne (1b)

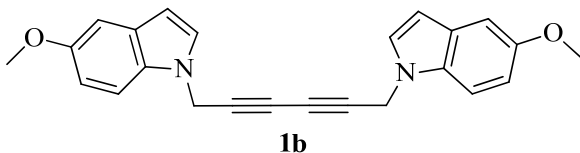

Beige solid, m.p.: 166-168 °C; yield: 72%. <sup>1</sup>H NMR (400 MHz) δ: 3.82 (s, 6H), 4.84 (s, 4H), 6.42 (dd, *J* = 3.2 and 0.8, 2H), 6.88 (dd, *J* = 8.9 and 2.4, 2H), 7.06 (d, *J* = 3.2, 2H), 7.07 (d, *J* = 2.4, 2H) and 7.21 (d, *J* = 8.9, 2H). <sup>13</sup>C NMR (100 MHz) δ: 36.5, 55.9, 69.0, 73.3, 102.1, 103.0, 109.9, 112.3, 127.8, 129.3, 131.1 and 154.5. IR (KBr, ν): 3102, 2956, 2935, 2832, 1728, 1616, 1576, 1482, 1432, 1397, 1243, 1152, 1030, 802 and 726 cm<sup>-1</sup>. MS (*m/z*, rel. int., %): 368 (3, M<sup>+</sup>), 78 (99), 63 (100), 62 (13) and 61 (36). Anal. Calc.: C, 78.24; H, 5.47; N, 7.60. Found: C, 77.86; H, 5.54; N, 7.25.

#### 1,6-Bis(5-bromo-1*H*-indol-1-yl)hexa-2,4-diyne (1c)

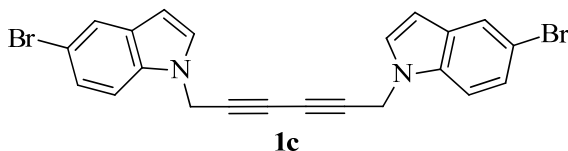

Beige solid, m.p.: 157-159 °C; yield: 76%. <sup>1</sup>H NMR (400 MHz, DMSO-*d*<sub>6</sub>) δ: 5.26 (s, 4H), 6.46 (dd, *J* = 3.2 and 0.7, 2H), 7.29 (dd, *J* = 8.7 and 1.9, 2H), 7.42 (d, *J* = 3.2, 2H), 7.47 (d, *J* = 8.7, 2H) and 7.75 (d, *J* = 1.9, 2H). <sup>13</sup>C NMR (100 MHz, DMSO-*d*<sub>6</sub>) δ: 35.6, 67.5, 75.0, 101.3, 111.8, 112.2, 122.7, 123.9, 129.8, 130.0 and 134.1. IR (KBr, ν): 3106, 1705, 1604, 1562, 1507, 1463, 1333, 1208, 793, 754 and 581 cm<sup>-1</sup>. MS (*m/z*, rel. int., %): 468 [2, (M+2)<sup>+</sup>], 466 (4, M<sup>+</sup>), 235 (27), 233 (28), 197 (55), 195 (55), 154 (60), 127 (15), 116 (78) and 89 (39). Anal. Calc.: C, 56.68; H, 3.03; N, 6.01. Found: C, 57.07; H, 3.13; N, 5.87.

### 1,6-Bis(2-methyl-1*H*-indol-1-yl)hexa-2,4-diyne (1d)

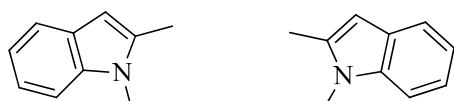

**1d**

Brown solid, m.p.: 218 °C (dec); yield: 83%. <sup>1</sup>H NMR (400 MHz, DMSO-*d*<sub>6</sub>) δ: 2.39 (s, 6H), 5.13 (s, 4H), 6.22 (s, 2H), 6.98-7.09 (m, 4H) and 7.40-7.43 (m, 4H). <sup>13</sup>C NMR (100 MHz, DMSO-*d*<sub>6</sub>) δ: 12.1, 32.4, 66.7, 75.3, 100.5, 109.3, 119.3, 119.5, 120.6, 127.7, 136.2 and 136.3. IR (KBr, ν): 2916, 1614, 1552, 1462, 1337, 787 and 745 cm<sup>-1</sup>. MS (*m/z*, rel. int., %): 337 [17, (M+1)<sup>+</sup>], 336 (60, M<sup>+</sup>), 205 (100), 204 (88), 191 (28), 167 (18), 149 (12), 130 (44), 97 (18), 81 (26) and 69 (47). HRMS (ESI-TOF, *m/z*): Obsd. 359.1507; C<sub>24</sub>H<sub>20</sub>N<sub>2</sub>Na [(M+Na)<sup>+</sup>] requires 359.1519.

### 1,6-Bis(5-*p*-tolyl-1*H*-indol-1-yl)hexa-2,4-diyne (1e)

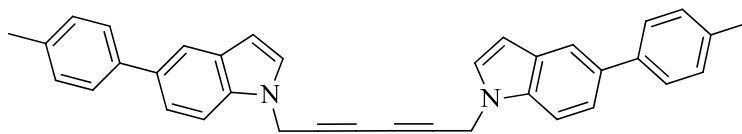

**1e**

Brown solid, m.p.: 175-177 °C; yield: 72%. <sup>1</sup>H NMR (400 MHz, DMSO-*d*<sub>6</sub>) δ: 2.33 (s, 6H), 5.27 (s, 4H), 6.50 (d, *J* = 3.1, 2H), 7.23 (d, *J* = 7.9, 4H), 7.38 (d, *J* = 3.1, 2H), 7.44 (dd, *J* = 8.6 and 1.6, 2H), 7.53-7.55 (m, 6H) and 7.79-7.80 (m, 2H). <sup>13</sup>C NMR (100 MHz, DMSO-*d*<sub>6</sub>) δ: 20.6, 35.6, 67.4, 75.4, 102.1, 110.3, 118.3, 120.8, 126.5, 128.9, 129.1, 129.4, 132.1, 134.9, 135.5 and 138.5. IR (KBr, ν): 2915, 1616, 1476, 1335, 799 and 720 cm<sup>-1</sup>. MS (*m/z*, rel. int., %): 489 [20, (M+1)<sup>+</sup>], 488 (50, M<sup>+</sup>), 282 (22), 281 (32), 267 (28), 266 (20), 244 (17), 208 (20), 207 (100), 206 (64), 204 (25), 97 (23) and 57 (46). HRMS (ESI-TOF, *m/z*): Obsd. 511.2129; C<sub>36</sub>H<sub>28</sub>N<sub>2</sub>Na [(M+Na)<sup>+</sup>] requires 511.2145.

### 1,6-Bis(9*H*-carbazol-9-yl)hexa-2,4-diyne (1f)

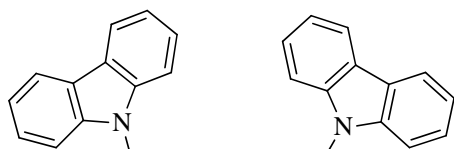

**1f**

White crystalline solid, m.p.: 204 °C (dec); yield: 60%. <sup>1</sup>H NMR (400 MHz, DMSO-*d*<sub>6</sub>) δ: 5.39 (s, 4H), 7.20-7.24 (m, 4H), 7.42-7.46 (m, 4H), 7.59 (d, *J* = 8.1, 4H) and 8.12 (d, *J* = 7.6, 4H). <sup>13</sup>C NMR (100 MHz, DMSO-*d*<sub>6</sub>) δ: 32.2, 66.5, 74.8, 109.2, 119.4, 120.1, 122.4, 125.7 and 139.3. IR (KBr, ν): 3050, 2910, 1625, 1599, 1485, 1454, 1325, 747 and 720 cm<sup>-1</sup>. MS (*m/z*, rel. int., %): 409 [16, (M+1)<sup>+</sup>], 408 (50, M<sup>+</sup>), 242 (36), 241 (100), 167 (18), 166 (29) and 140 (16). HRMS (ESI-TOF, *m/z*): Obsd. 431.1521; C<sub>30</sub>H<sub>20</sub>N<sub>2</sub>Na [(M+Na)<sup>+</sup>] requires 431.1524.

### General procedure for the preparation of unsymmetric 1,3-diynes (3a-f)

Solid CuI (10 mg, 0.05 mmol, 5 mol%) and NiCl<sub>2</sub>·6H<sub>2</sub>O (12 mg, 0.05 mmol, 5 mol%) were added to a stirred solution of TMEDA (30 μL, 0.2 mmol, 20 mol%) in THF (4 mL). The aryl acetylene (5 mmol) and the *N*-propargyl indole or carbazole (1 mmol) were successively added and the system was allowed to stir at room temperature for 6 h. Then, the volatiles were evaporated under reduced pressure and the residue was chromatographically purified, eluting with hexane.

#### 1-(5-Phenylpenta-2,4-diyanyl)-1*H*-indole (3a)

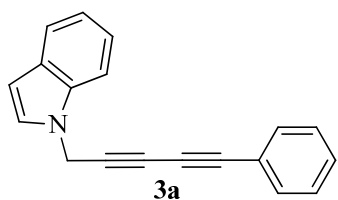

Light brown solid, m.p.: 68-70 °C; yield: 76%. <sup>1</sup>H NMR (400 MHz) δ: 4.97 (s, 2H), 6.53 (dd, *J* = 3.2 and 0.6, 1H), 7.12-7.19 (m, 2H), 7.23-7.34 (m, 4H), 7.38 (d, *J* = 8.2, 1H), 7.43-7.45 (m, 2H) and 7.63 (d, *J* = 7.8, 1H). <sup>13</sup>C NMR (100 MHz) δ: 36.6, 69.9, 73.2, 76.4, 78.2, 102.4, 109.3, 120.0, 121.1, 121.2, 122.0, 127.2, 128.4, 128.9, 129.4, 132.6 and 135.8. IR (KBr, ν): 3045, 2942, 2240, 1609, 1573, 1513, 1483, 1355, 1304, 1254, 1192, 752, 732 and 686 cm<sup>-1</sup>. MS (*m/z*, rel. int., %): 256 [15, (M+1)<sup>+</sup>], 255 (73, M<sup>+</sup>), 254 (44), 140 (12), 139 (100), 113 (9) and 89 (14). HRMS (ESI-TOF, *m/z*): Obsd. 278.0948; C<sub>19</sub>H<sub>13</sub>NNa [(M+Na)<sup>+</sup>] requires 278.0946.

#### 1-(5-*p*-Tolylpenta-2,4-diyanyl)-1*H*-indole (3b)

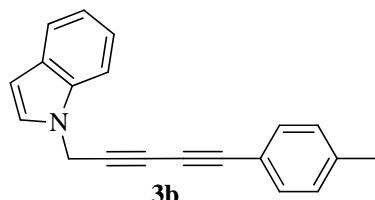

Light brown solid, m.p.: 83-85 °C; yield: 70%. <sup>1</sup>H NMR (400 MHz) δ: 2.33 (s, 3H), 4.99 (s, 2H), 6.54 (dd, *J* = 3.2 and 0.5, 1H), 7.09 (d, *J* = 8.0, 2H), 7.12-7.16 (m, 1H), 7.18 (d, *J* = 3.2, 1H), 7.24-7.27 (m, 1H), 7.35 (d, *J* = 8.1, 2H), 7.40 (d, *J* = 8.3, 1H) and 7.64 (d, *J* = 7.9, 1H). <sup>13</sup>C NMR (100 MHz) δ: 21.5, 36.7, 70.1, 72.7, 76.1, 78.6, 102.4, 109.3, 118.2, 120.0, 121.1, 122.0, 127.2, 129.0, 129.2, 132.5, 135.9 and 139.8. IR (KBr, ν): 3028, 2951, 2239, 1604, 1508, 1462, 1336, 1314, 1257, 1182, 811, 742 and 720 cm<sup>-1</sup>. MS (*m/z*, rel. int., %): 270 [14, (M+1)<sup>+</sup>], 269 (63, M<sup>+</sup>), 268 (25), 207 (13), 154 (14), 153 (100) and 152 (23). HRMS (ESI-TOF, *m/z*): Obsd. 270.1255; C<sub>20</sub>H<sub>16</sub>N [(M+H)<sup>+</sup>] requires 270.1283.

#### 5-Methoxy-1-(5-phenylpenta-2,4-diyanyl)-1*H*-indole (3c)

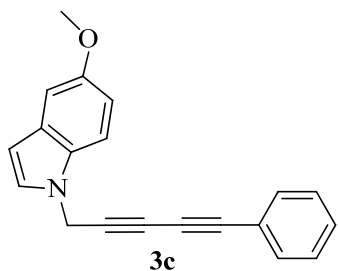

Beige solid, m.p: 105-107 °C; yield: 83%. <sup>1</sup>H NMR (400 MHz) δ: 3.84 (s, 3H), 4.95 (s, 2H), 6.45 (d, *J* = 3.0, 1H), 6.91 (dd, *J* = 8.8 and 2.3, 1H), 7.09 (d, *J* = 2.3, 1H), 7.14 (d, *J* = 3.0, 1H), 7.26-7.35 (m, 4H) and 7.44-7.46 (m, 2H). <sup>13</sup>C NMR (100 MHz) δ: 36.8, 55.9, 69.8, 73.2, 76.5, 78.2, 102.0, 103.0, 110.0, 112.3, 121.2, 127.9, 128.4, 129.4, 131.2, 132.6 and 154.5. IR (KBr, ν): 2943, 2901, 2244, 1619, 1574, 1486, 1451, 1423, 1347, 1237, 1152, 1026, 801, 757, 722 and 687 cm<sup>-1</sup>. MS (*m/z*, rel. int., %): 286 [16, (M+1)<sup>+</sup>], 285 (69, M<sup>+</sup>), 281 (11), 254 (11), 207 (29), 140 (13) and 139 (100). HRMS (ESI-TOF, *m/z*): Obsd. 308.1039; C<sub>20</sub>H<sub>15</sub>NNaO [(M+Na)<sup>+</sup>] requires 308.1046.

### 5-Bromo-1-(5-*p*-tolylpenta-2,4-diyanyl)-1*H*-indole (3d)

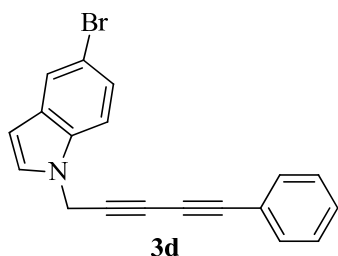

White solid, m.p.: 120-122 °C; yield: 60%. <sup>1</sup>H NMR (400 MHz) δ: 2.33 (s, 3H), 4.96 (s, 2H), 6.46 (d, *J* = 3.1, 1H), 7.09 (d, *J* = 8.0, 2H), 7.17 (d, *J* = 3.1, 1H), 7.26 (d, *J* = 8.7, 1H), 7.31-7.36 (m, 3H) and 7.74 (d, *J* = 1.6, 1H). <sup>13</sup>C NMR (100 MHz) δ: 21.6, 36.9, 70.5, 72.5, 75.4, 78.9, 102.0, 110.8, 113.4, 118.0, 123.6, 124.9, 128.5, 129.2, 130.7, 132.6, 134.6 and 140.0. IR (KBr, ν): 2916, 2891, 2247, 1650, 1560, 1508, 1463, 1433, 1400, 1344, 1268, 1242, 1210, 823, 794, 755 and 723 cm<sup>-1</sup>. MS (*m/z*, rel. int., %): 349 [8, (M+2)<sup>+</sup>], 347 (9, M<sup>+</sup>), 209 (12), 208 (21), 207 (100), 153 (44), 133 (15), 96 (17) and 73 (33). HRMS (ESI-TOF, *m/z*): Obsd. 370.0190; C<sub>20</sub>H<sub>14</sub>BrNNa [(M+Na)<sup>+</sup>] requires 370.0202.

### 9-(5-Phenylpenta-2,4-diyanyl)-9*H*-carbazole (3e)

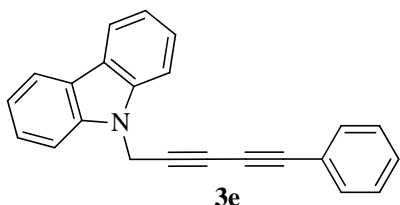

White crystalline solid, m.p: 154-155 °C; yield: 80%. <sup>1</sup>H NMR (400 MHz, DMSO-*d*<sub>6</sub>) δ: 5.58 (s, 2H), 7.25-7.28 (m, 2H), 7.34-7.44 (m, 3H), 7.47-7.53 (m, 4H), 7.72 (d, *J* = 8.2, 2H) and 8.18 (d, *J* = 7.8, 2H). <sup>13</sup>C NMR (100 MHz, DMSO-*d*<sub>6</sub>) δ: 32.6, 67.0, 72.9, 77.2, 79.4, 109.4, 119.5, 119.9, 120.3, 122.5, 125.9, 128.6, 129.8, 132.3 and 139.5. IR (KBr, ν): 3053, 2914, 2244, 1626, 1597, 1487, 1456, 1329, 748, 720 and 684 cm<sup>-1</sup>. MS (*m/z*, rel. int., %): 305 (32, M<sup>+</sup>), 304 (24), 166 (10), 140 (21) and 139 (100). Anal. Calc.: C, 90.46; H, 4.95; N, 4.59. Found: C, 90.10; H, 4.91; N, 4.29.

### 9-(5-*p*-Tolylpenta-2,4-diyanyl)-9*H*-carbazole (3f)

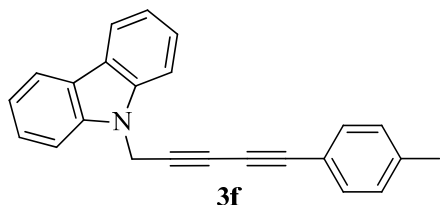

White crystalline solid, m.p: 155-156 °C; yield: 85%. <sup>1</sup>H NMR (400 MHz, DMSO-*d*<sub>6</sub>) δ: 2.27 (s, 3H), 5.57 (s, 2H), 7.15 (d, *J* = 7.9, 2H), 7.24-7.28 (m, 2H), 7.36 (d, *J* = 7.9, 2H), 7.49-7.53 (m, 2H), 7.72 (d, *J* = 8.2, 2H) and 8.17 (d, *J* = 7.7, 2H). <sup>13</sup>C NMR (100 MHz, DMSO-*d*<sub>6</sub>) δ: 20.9, 32.6, 67.2, 72.4, 77.5, 78.9, 109.4, 116.8, 119.5, 120.2, 122.5, 125.8, 129.2, 132.2, 139.5 and 139.9. IR (KBr, ν): 3052, 2912, 2242, 1627, 1603, 1489, 1455, 1332, 812, 746 and 719 cm<sup>-1</sup>. MS (*m/z*, rel. int., %): 319 (5, M<sup>+</sup>), 170 (65), 150 (12), 135 (22), 133 (57), 103 (21), 102 (29), 86 (100), 84 (100) and 66 (80). HRMS (ESI-TOF, *m/z*): Obsd. 320.1420; C<sub>24</sub>H<sub>18</sub>N [(M+H)<sup>+</sup>] requires 320.1434.

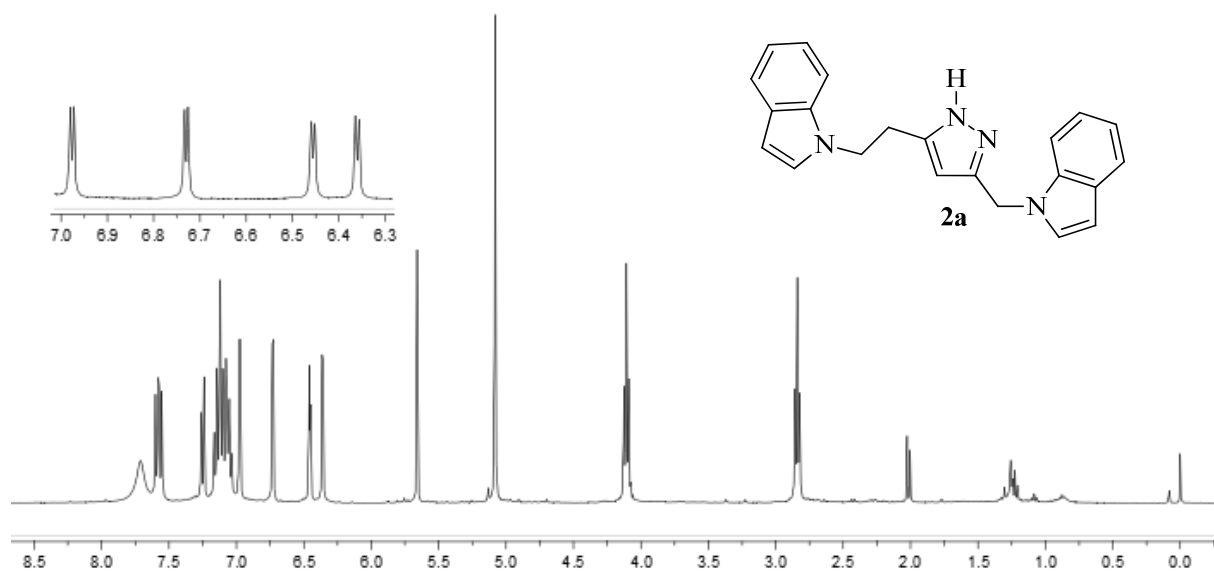

**Figure S1.** 400 MHz  $^1\text{H}$  NMR spectrum of compound **2a** in  $\text{CDCl}_3$ .

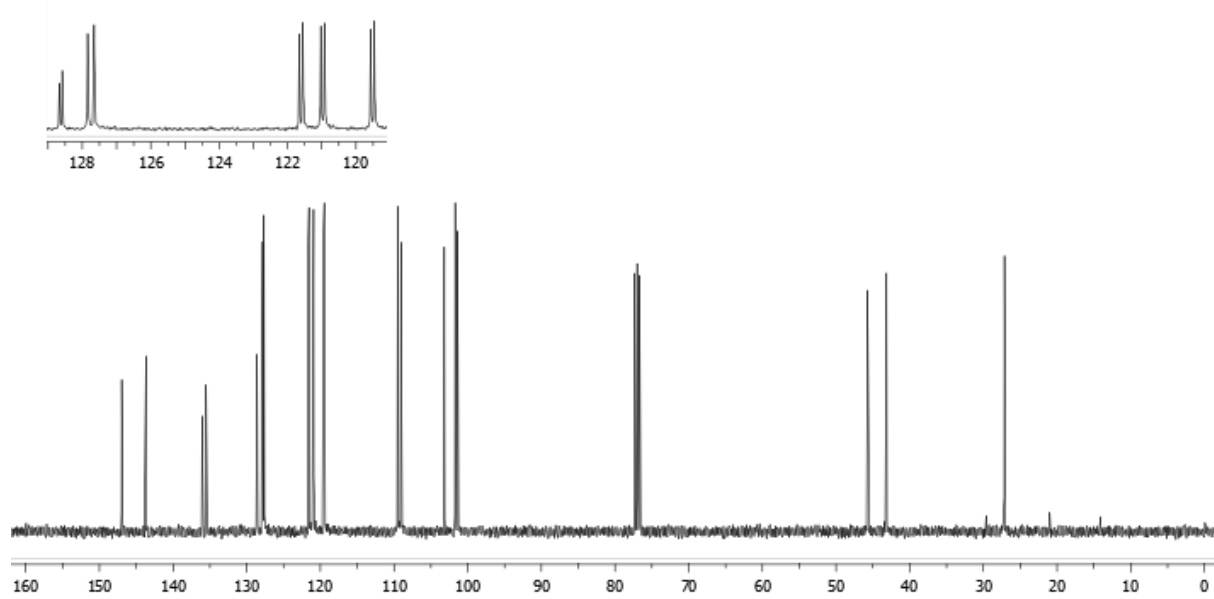

**Figure S2.** 100 MHz  $^{13}\text{C}$  NMR spectrum of compound **2a** in  $\text{CDCl}_3$ .

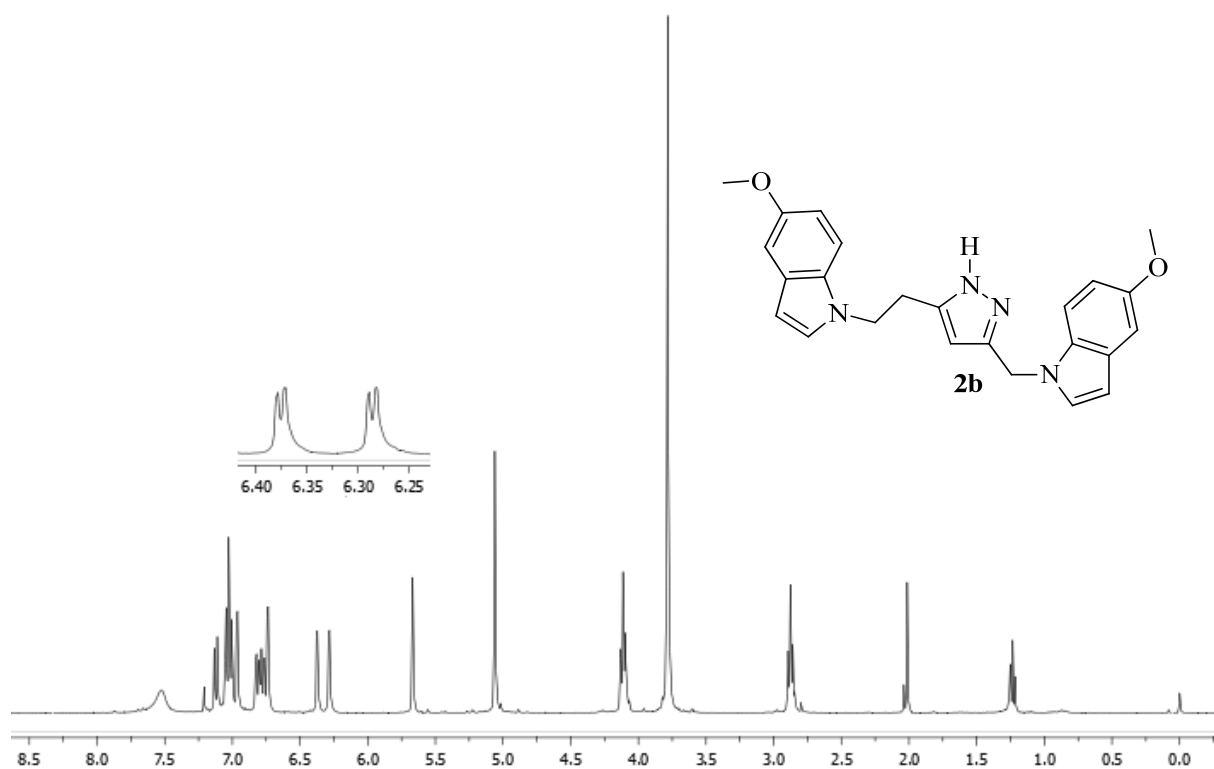

**Figure S3.** 400 MHz <sup>1</sup>H NMR spectrum of compound **2b** in CDCl<sub>3</sub>.

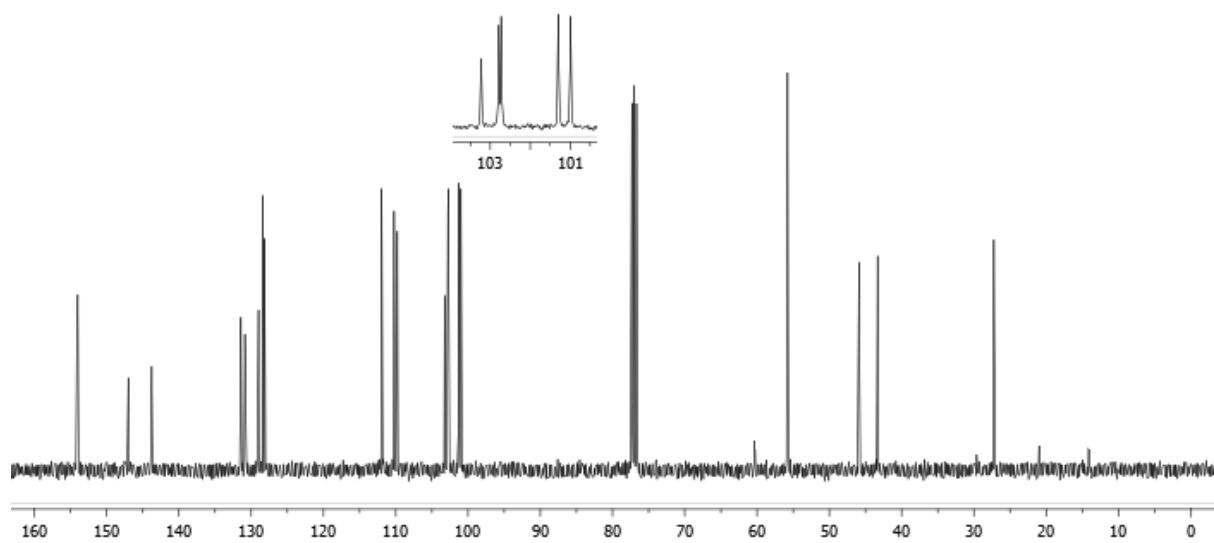

**Figure S4.** 100 MHz <sup>13</sup>C NMR spectrum of compound **2b** in CDCl<sub>3</sub>.



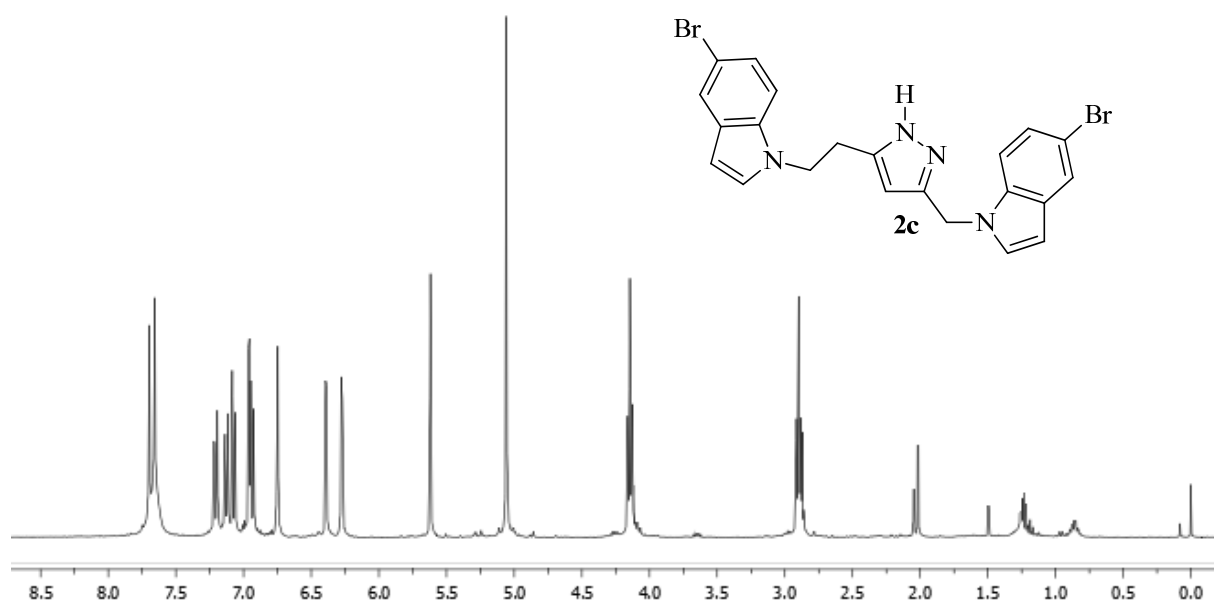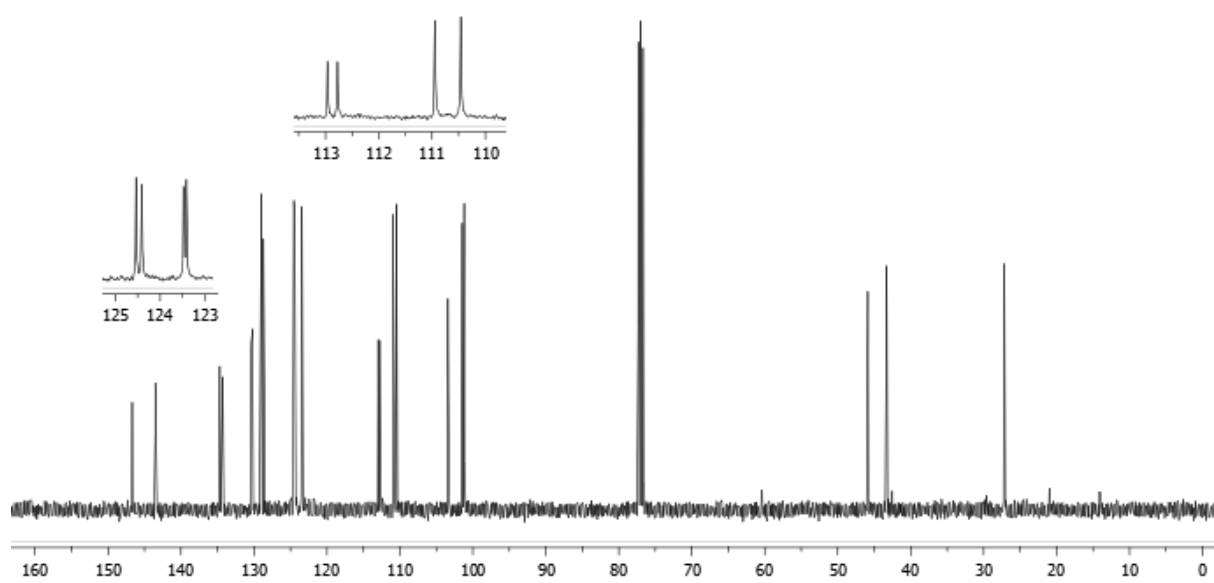

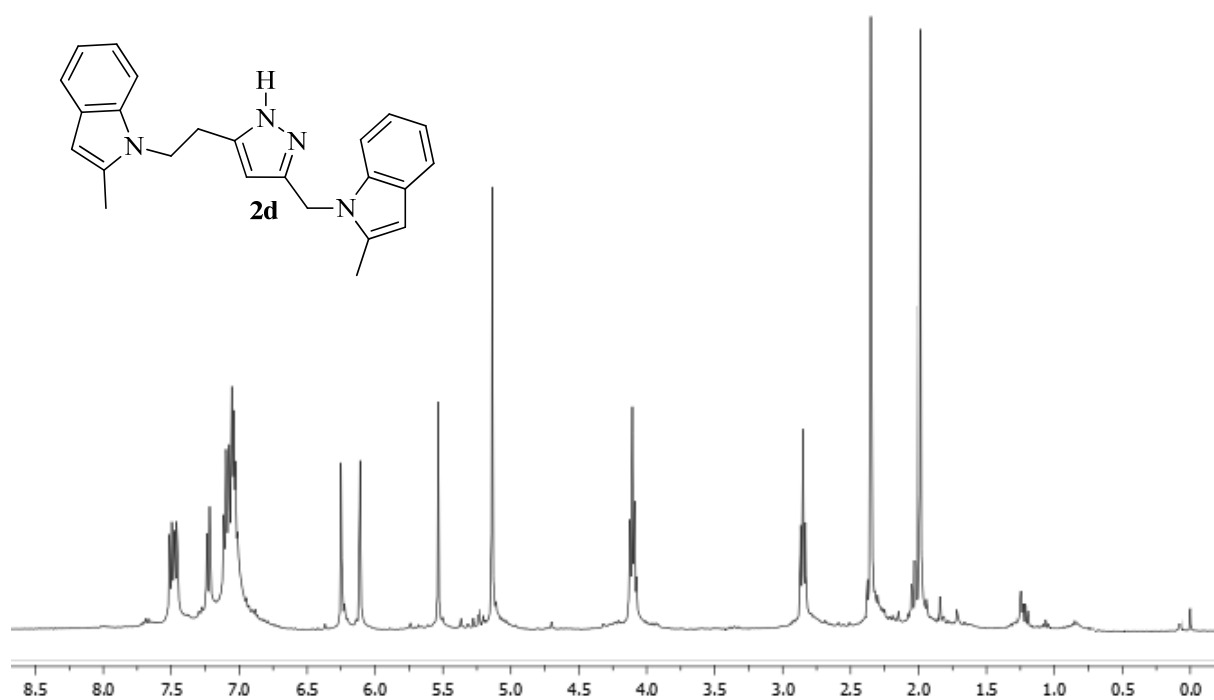

**Figure S7.** 400 MHz <sup>1</sup>H NMR spectrum of compound **2d** in CDCl<sub>3</sub>.

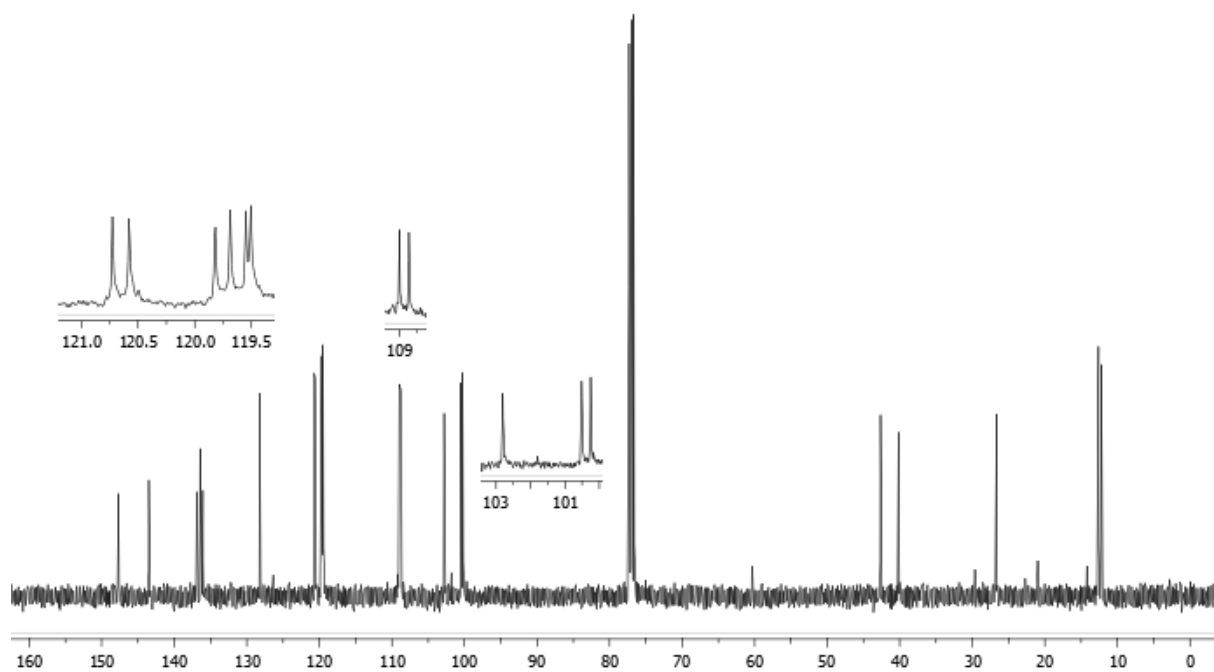

**Figure S8.** 100 MHz <sup>13</sup>C NMR spectrum of compound **2d** in CDCl<sub>3</sub>.

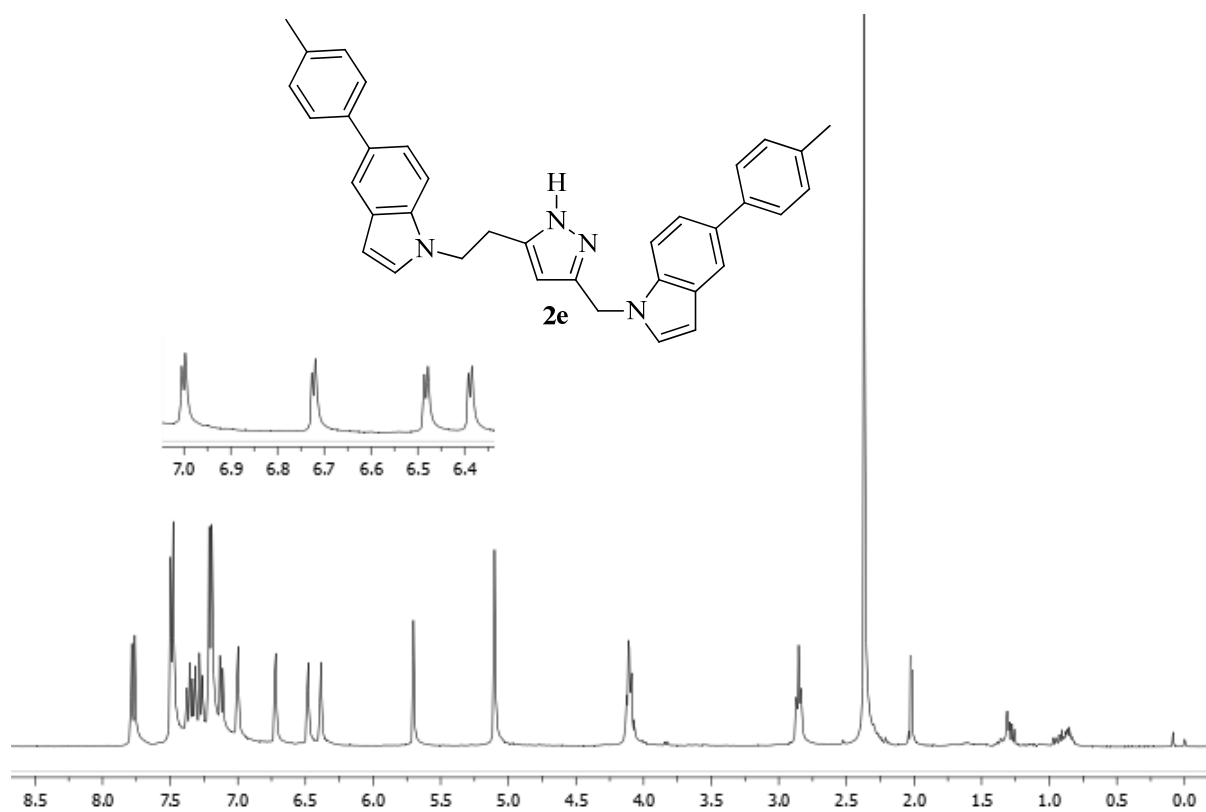

**Figure S9.** 400 MHz  $^1\text{H}$  NMR spectrum of compound **2e** in  $\text{CDCl}_3$ .

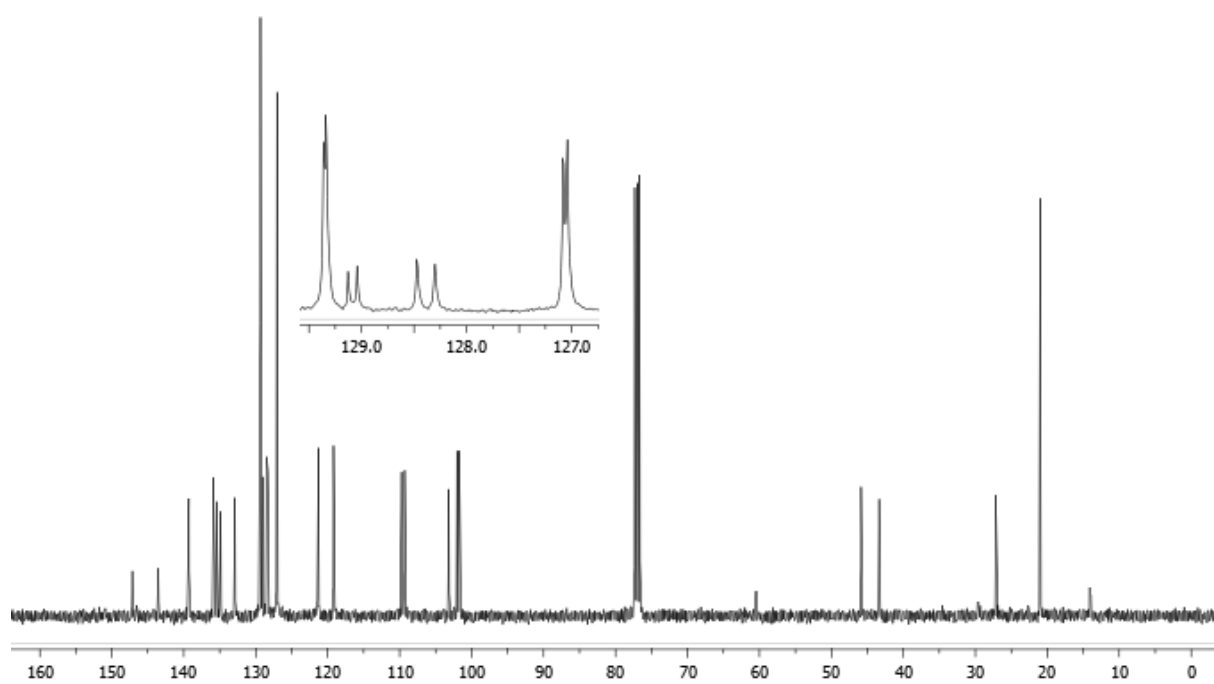

**Figure S10.** 100 MHz  $^{13}\text{C}$  NMR spectrum of compound **2e** in  $\text{CDCl}_3$ .

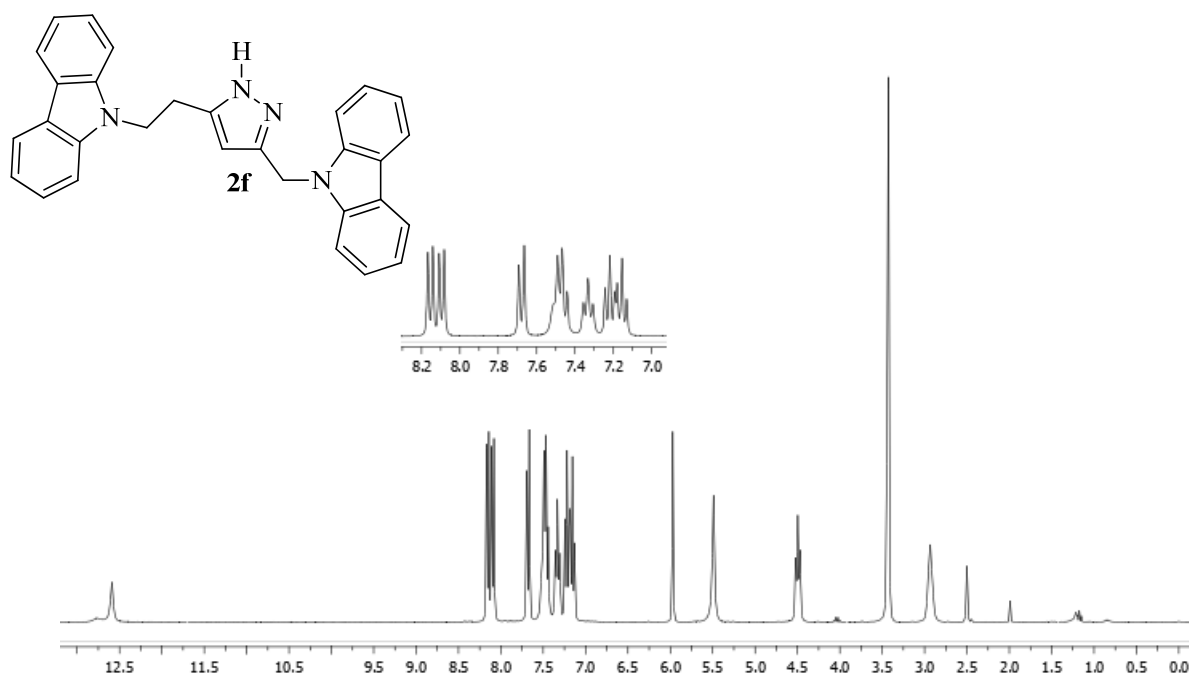

**Figure S11.** 300 MHz  $^1\text{H}$  NMR spectrum of compound **2f** in  $\text{DMSO-}d_6$ .

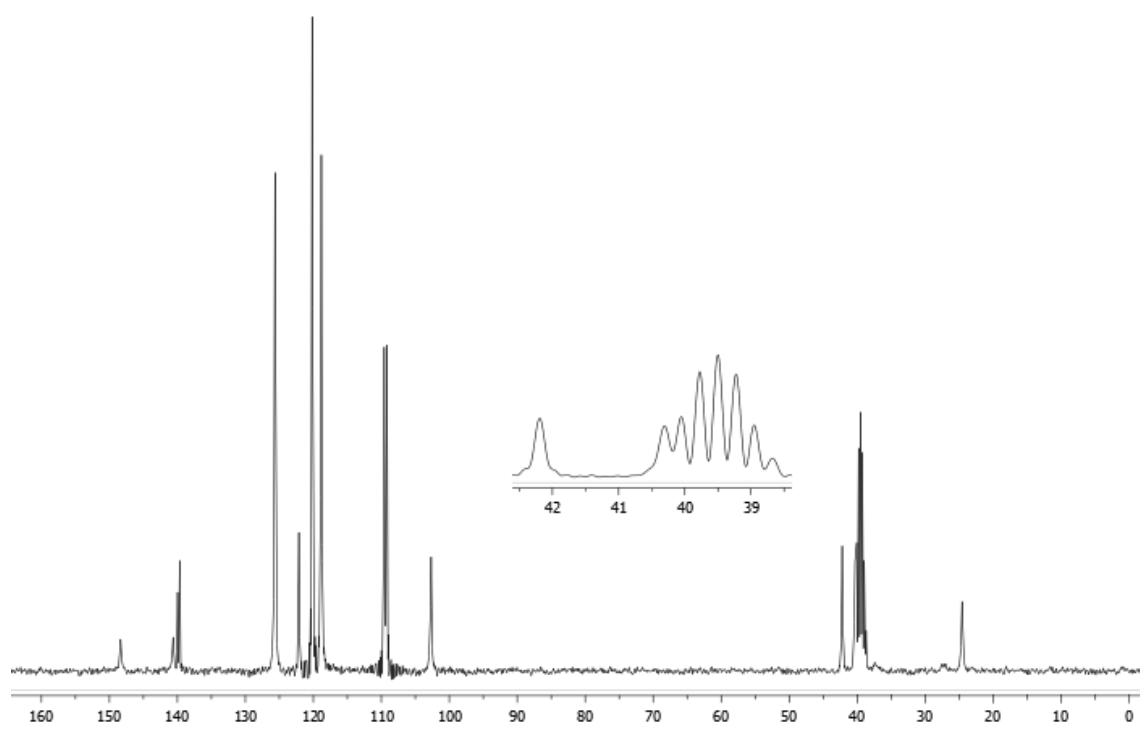

**Figure S12.** 75 MHz  $^{13}\text{C}$  NMR spectrum of compound **2f** in  $\text{DMSO-}d_6$ .

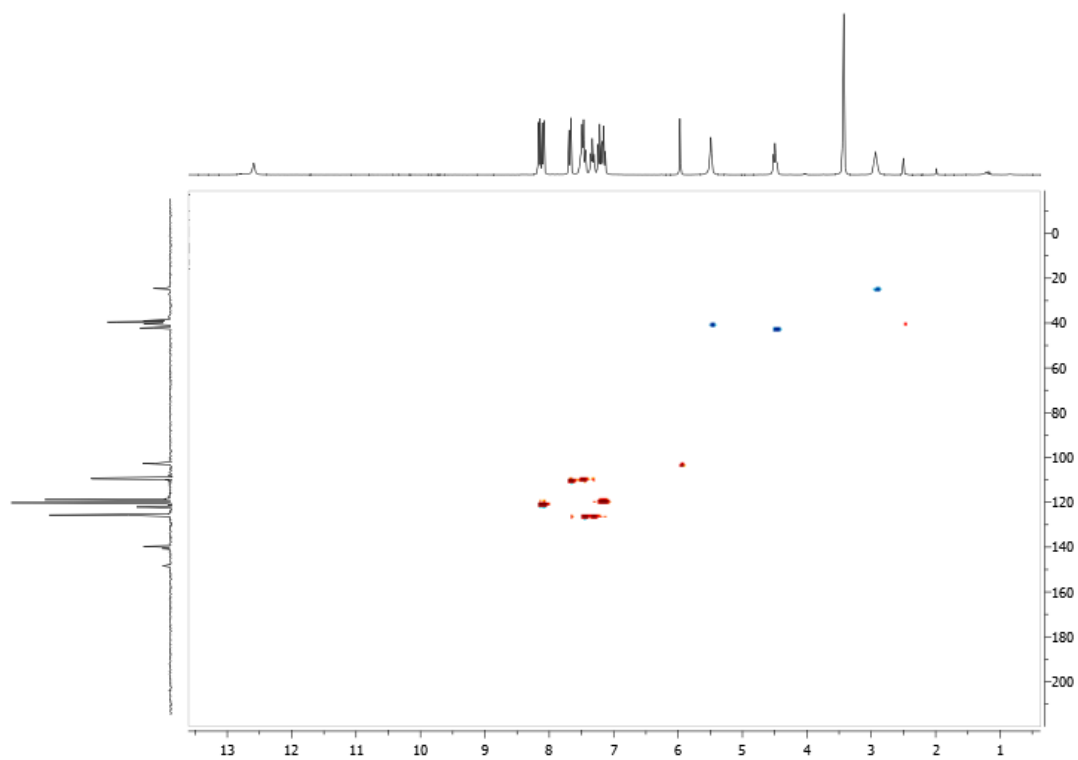

**Figure S13.** HSQC spectrum of compound **2f** in DMSO- $d_6$ .

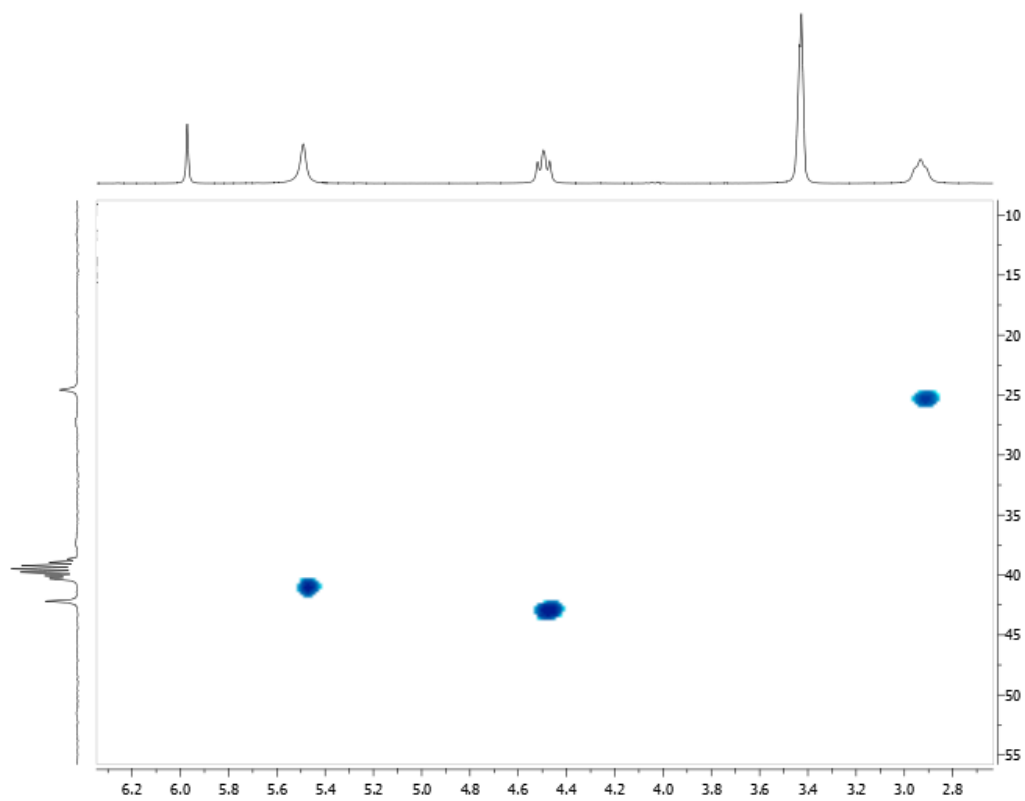

**Figure S14.** Expansion of HSQC spectrum of compound **2f** in DMSO- $d_6$ .

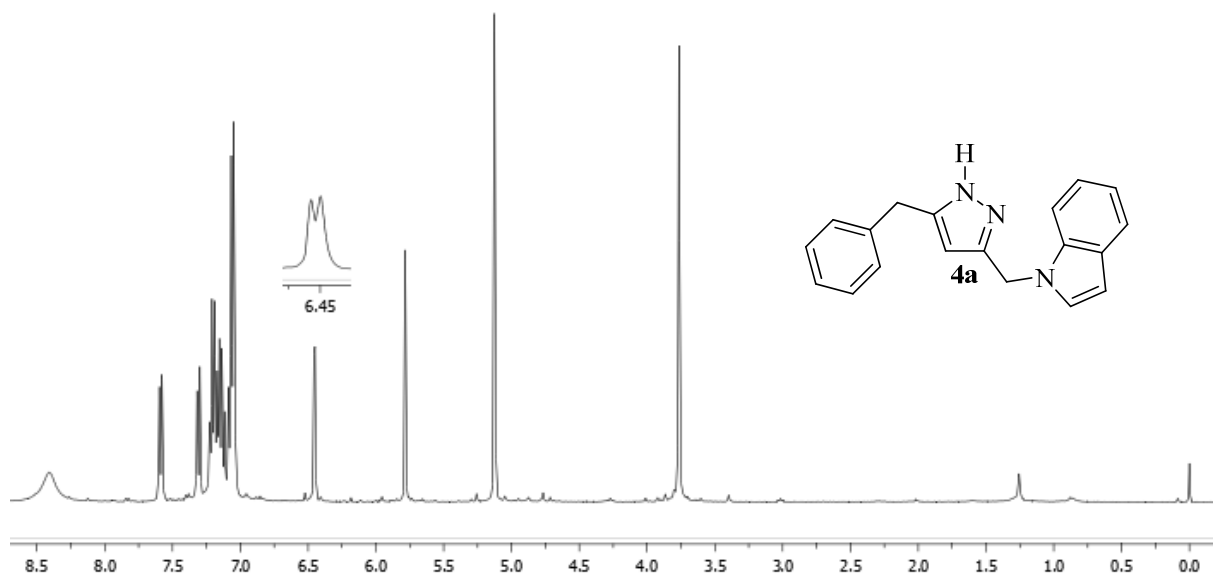

**Figure S15.** 400 MHz  $^1\text{H}$  NMR spectrum of compound **4a** in  $\text{CDCl}_3$ .

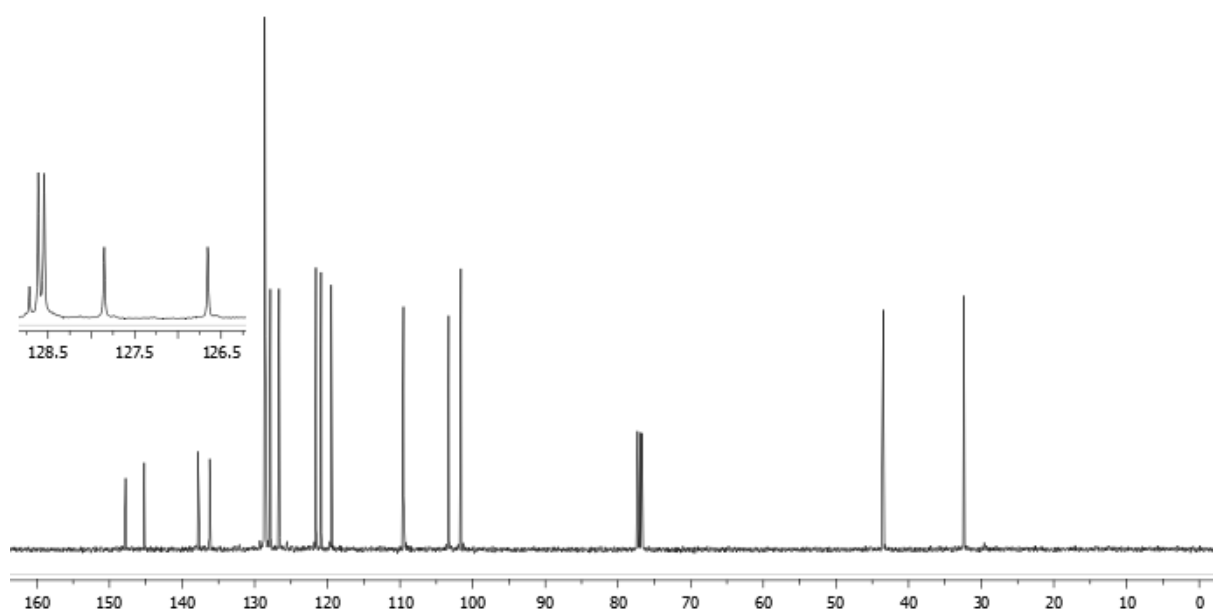

**Figure S16.** 100 MHz  $^{13}\text{C}$  NMR spectrum of compound **4a** in  $\text{CDCl}_3$ .

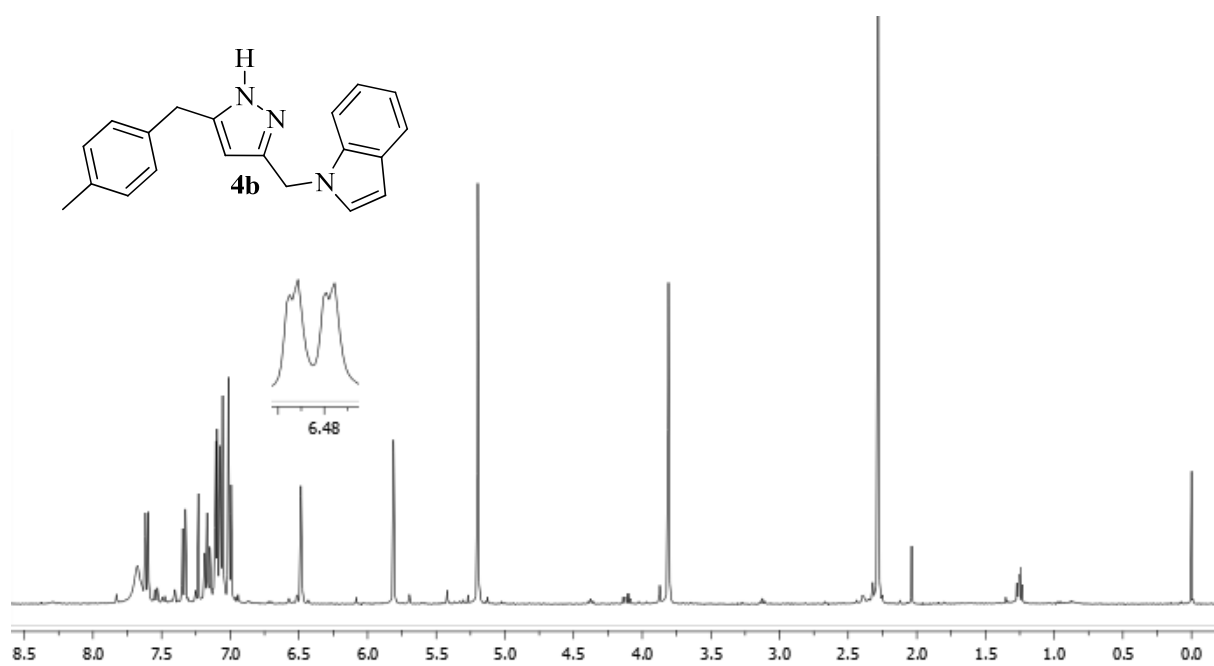

**Figure S17.** 400 MHz  $^1\text{H}$  NMR spectrum of compound **4b** in  $\text{CDCl}_3$ .

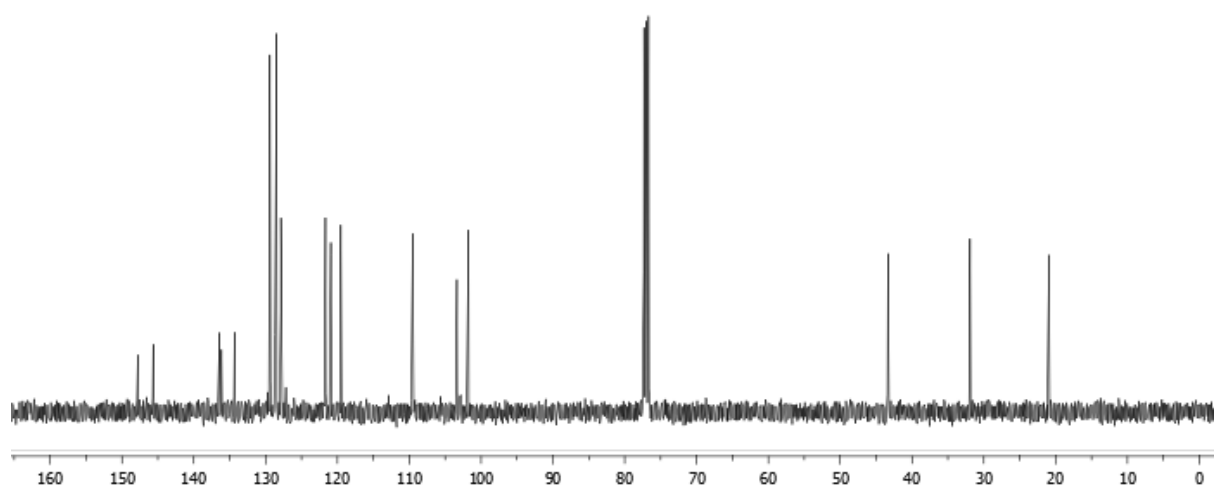

**Figure S18.** 100 MHz  $^{13}\text{C}$  NMR spectrum of compound **4b** in  $\text{CDCl}_3$ .

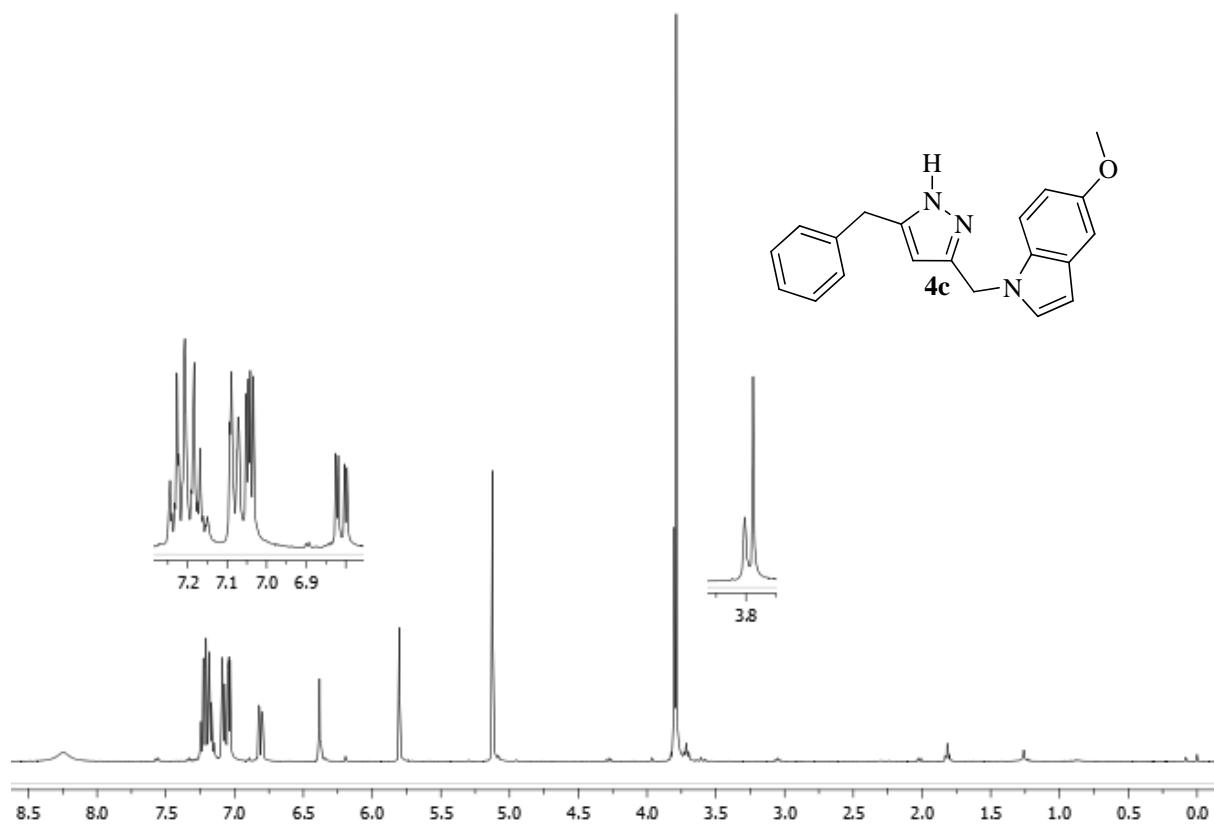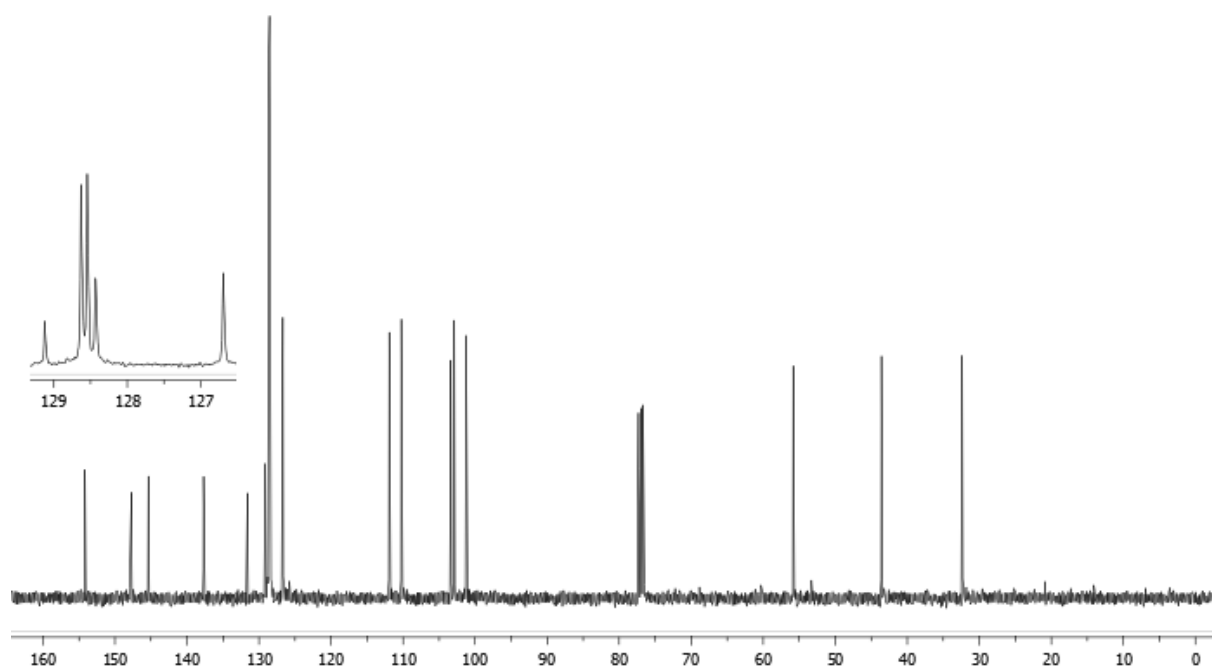



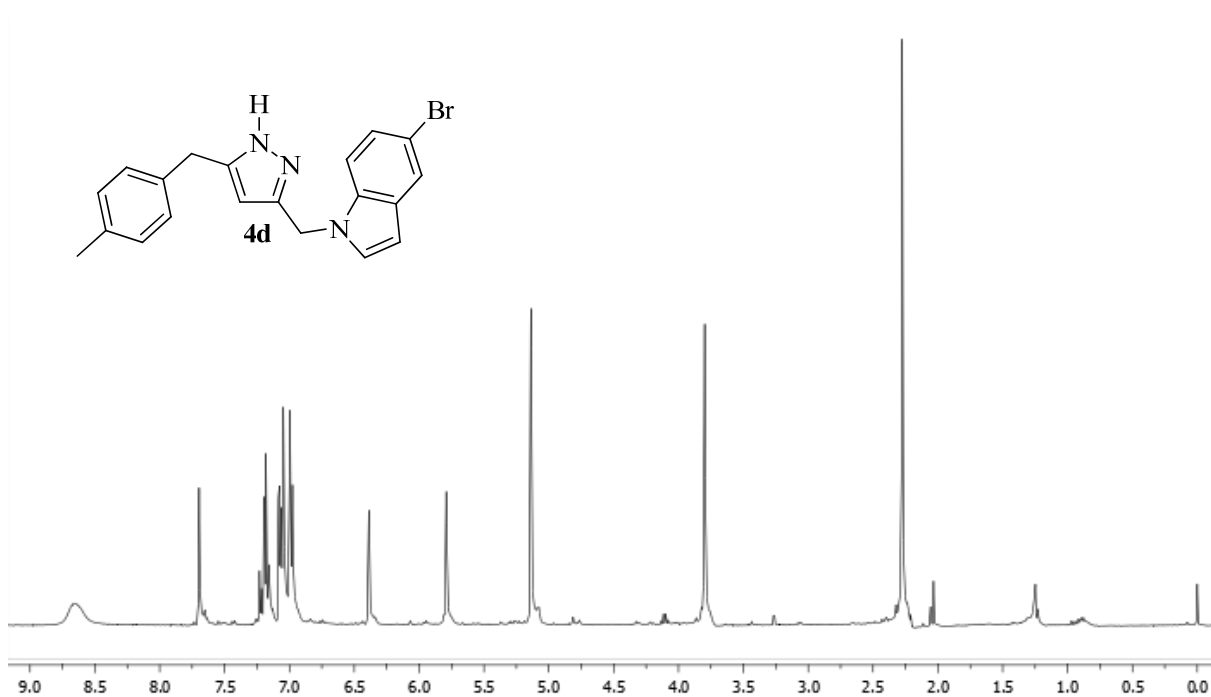

**Figure S21.** 400 MHz <sup>1</sup>H NMR spectrum of compound **4d** in CDCl<sub>3</sub>.

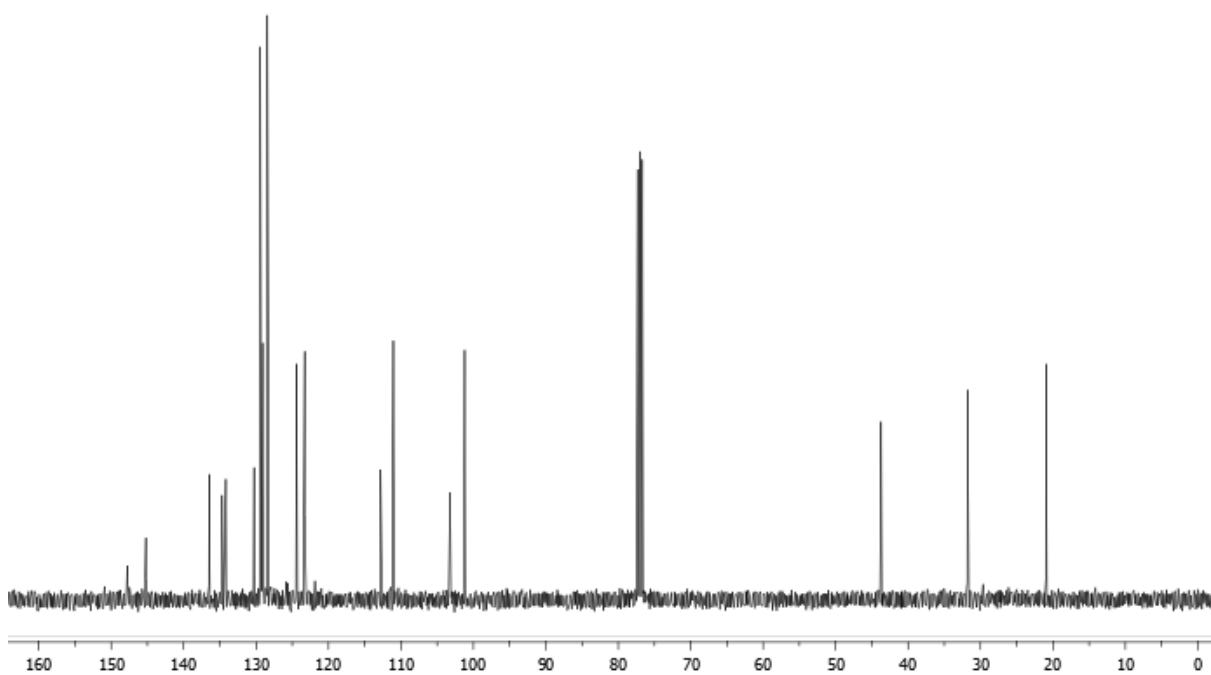

**Figure S22.** 100 MHz <sup>13</sup>C NMR spectrum of compound **4d** in CDCl<sub>3</sub>.

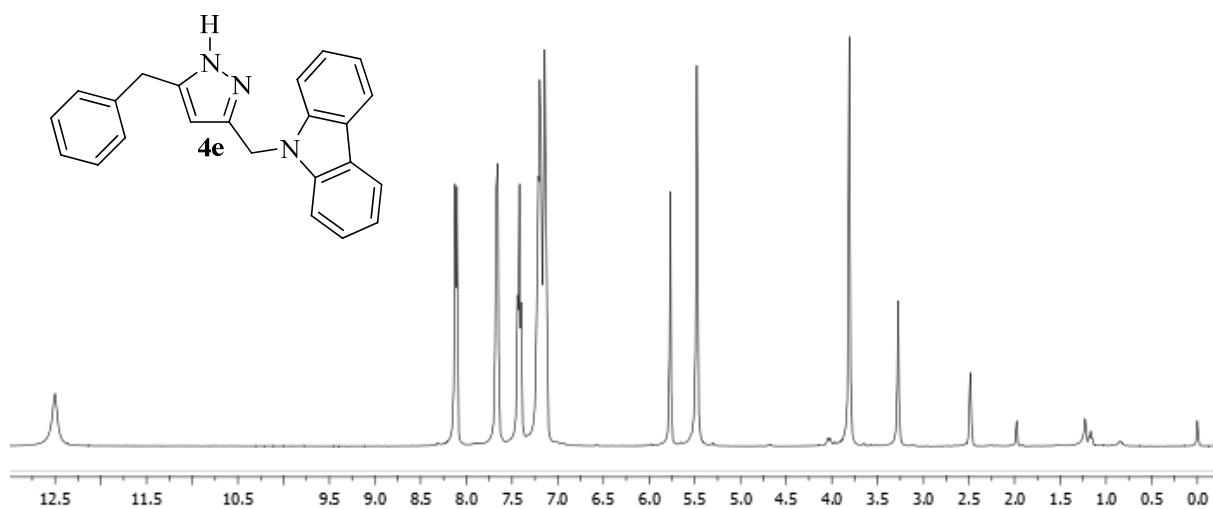

**Figure S23.** 400 MHz  $^1\text{H}$  NMR spectrum of compound **4e**  $\text{DMSO-}d_6$ .

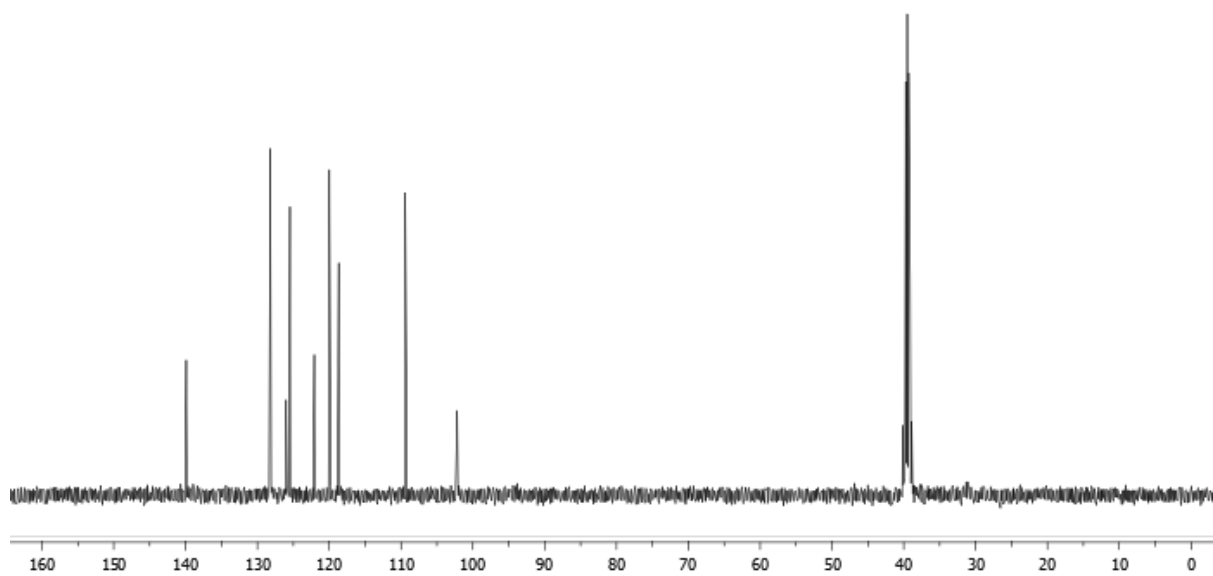

**Figure S24.** 100 MHz  $^{13}\text{C}$  NMR spectrum of compound **4e** in  $\text{DMSO-}d_6$ .

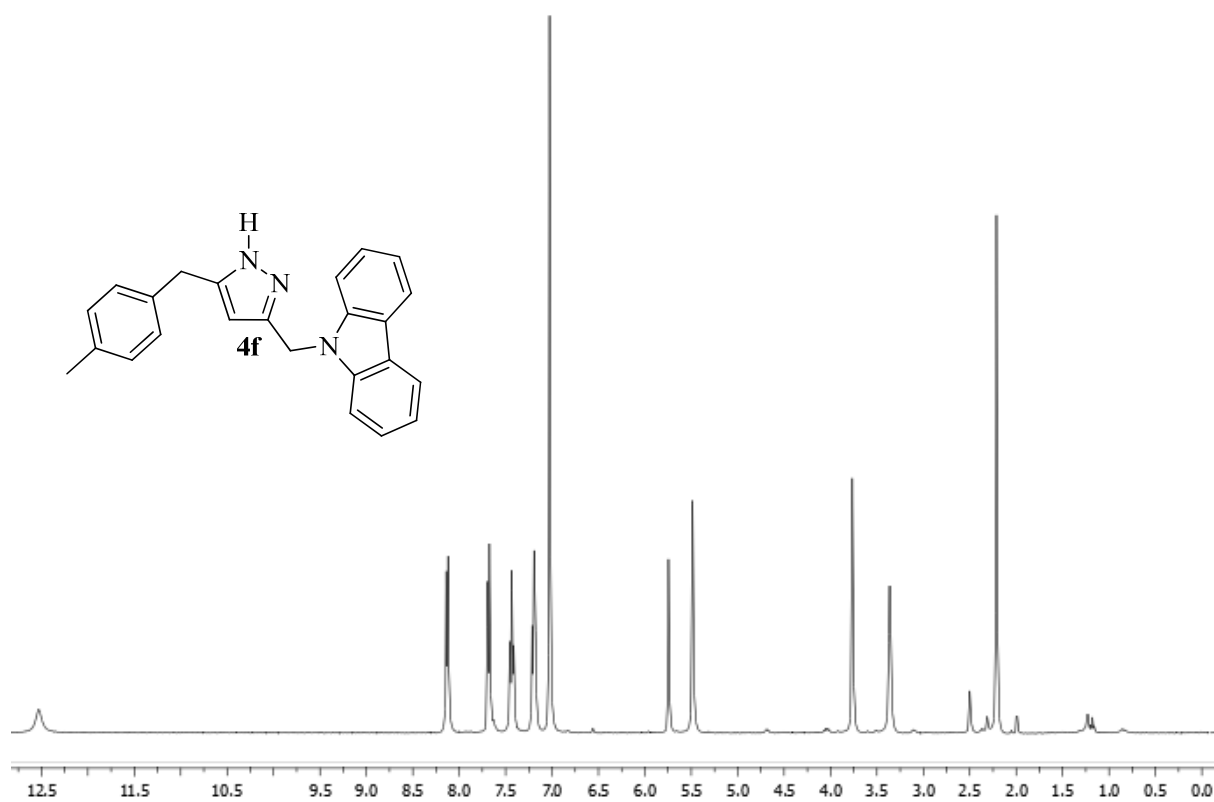

**Figure S25.** 300 MHz  $^1\text{H}$  NMR spectrum of compound **4f** in  $\text{DMSO-}d_6$ .

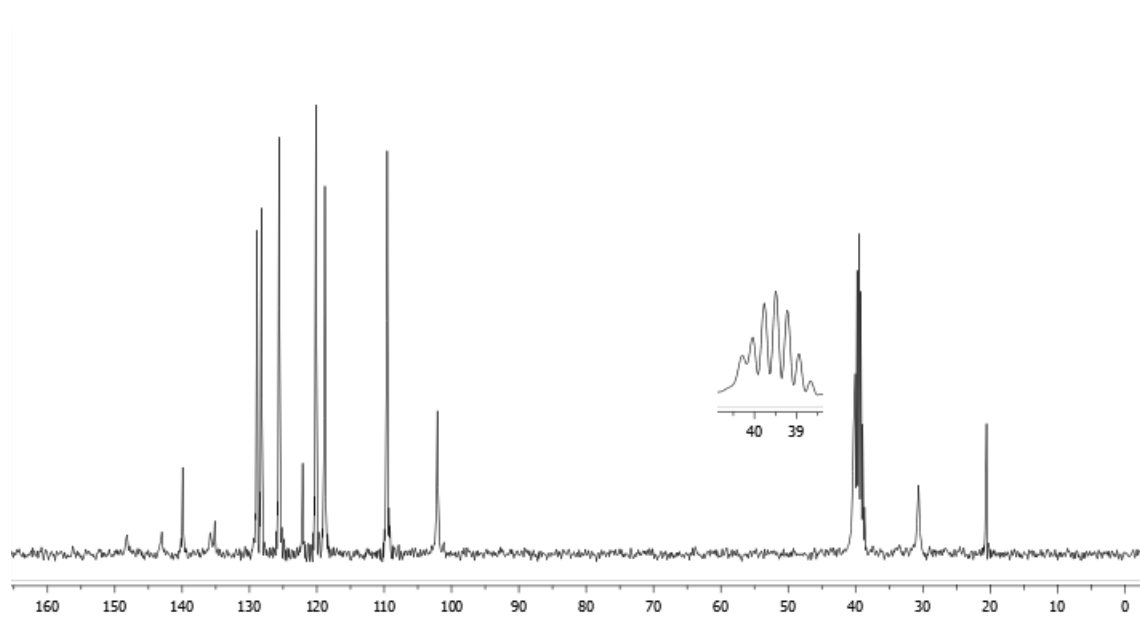

**Figure S26.** 75 MHz  $^{13}\text{C}$  NMR spectrum of compound **4f** in  $\text{DMSO-}d_6$ .

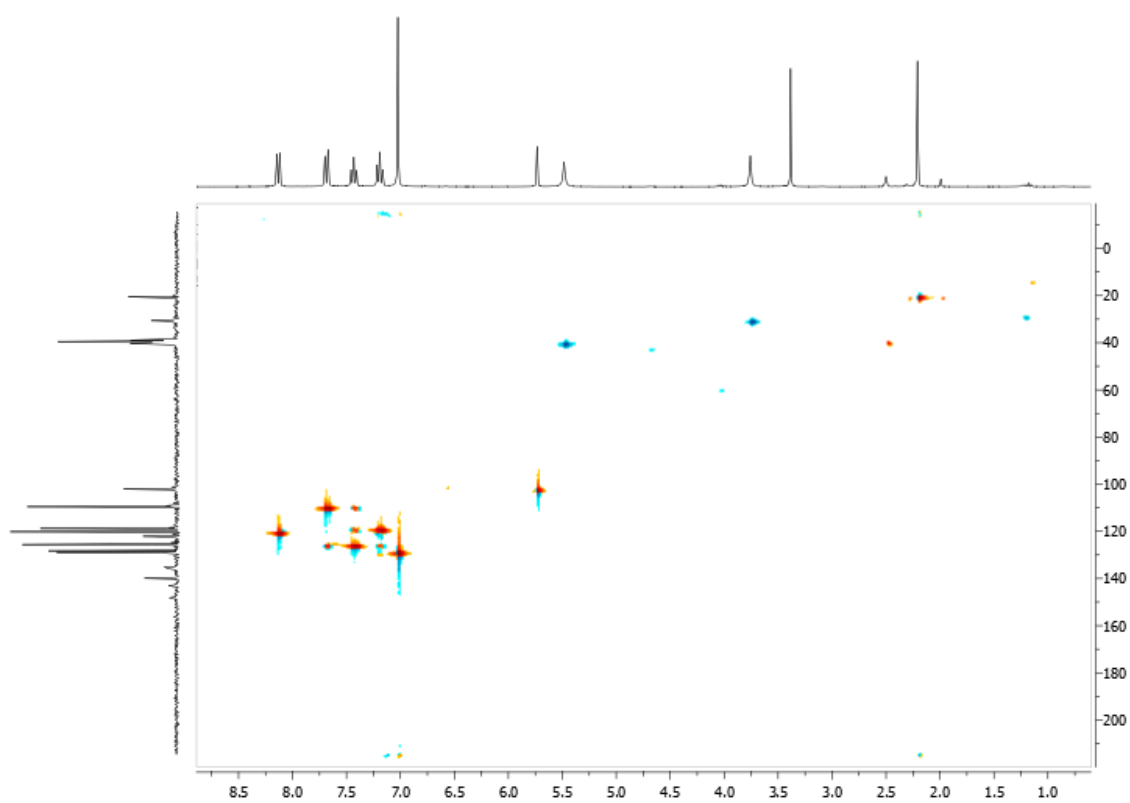

**Figure S27.** HSQC spectrum of compound **4f** in DMSO- $d_6$ .

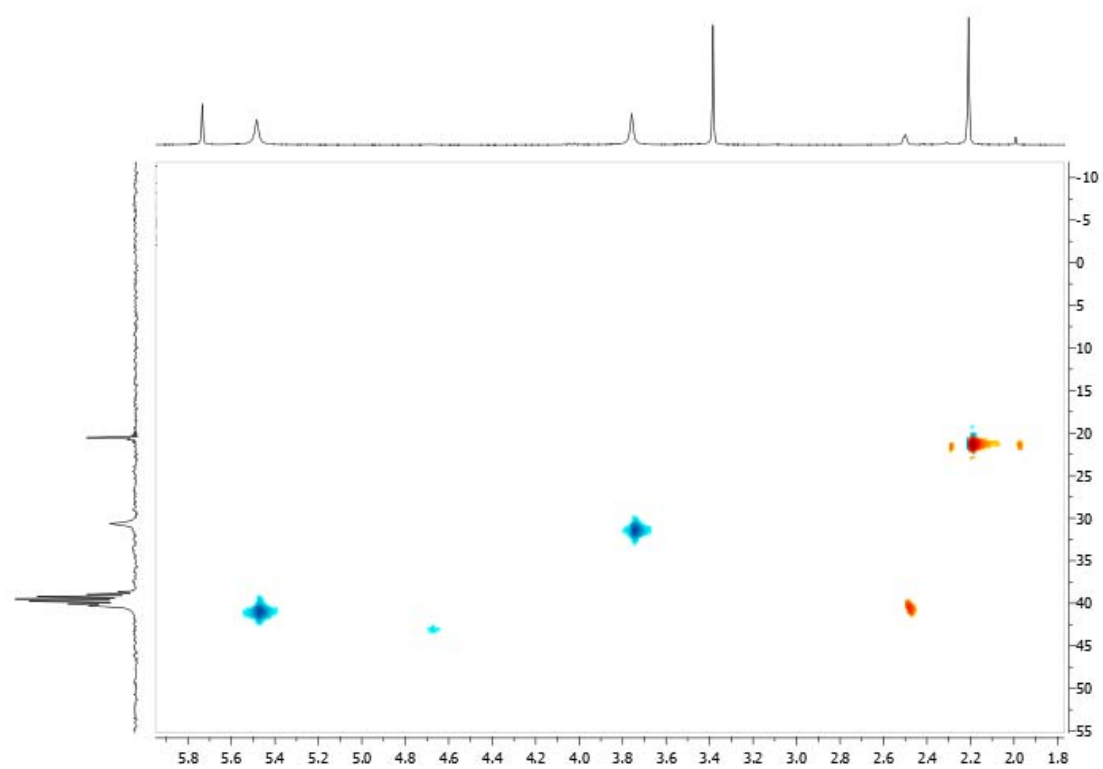

**Figure S28.** Expansion of the HSQC spectrum of compound **4f** in DMSO- $d_6$ .

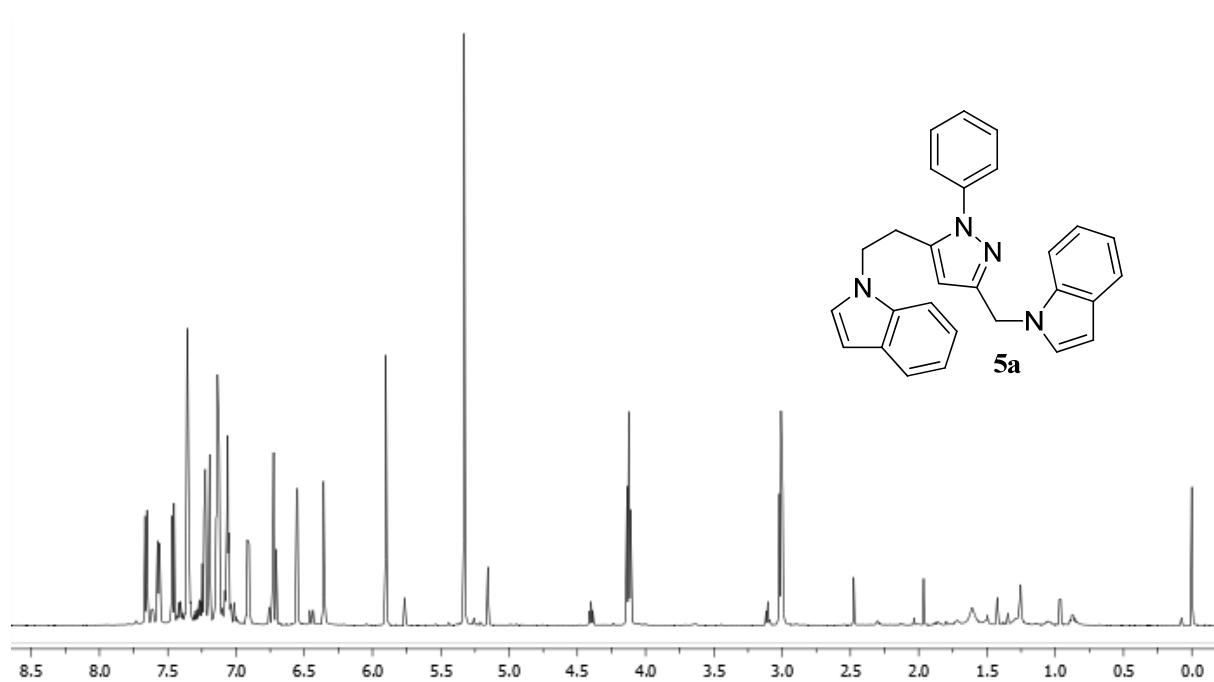

**Figure S29.** 600 MHz <sup>1</sup>H NMR spectrum of compound **5a** in CDCl<sub>3</sub>.

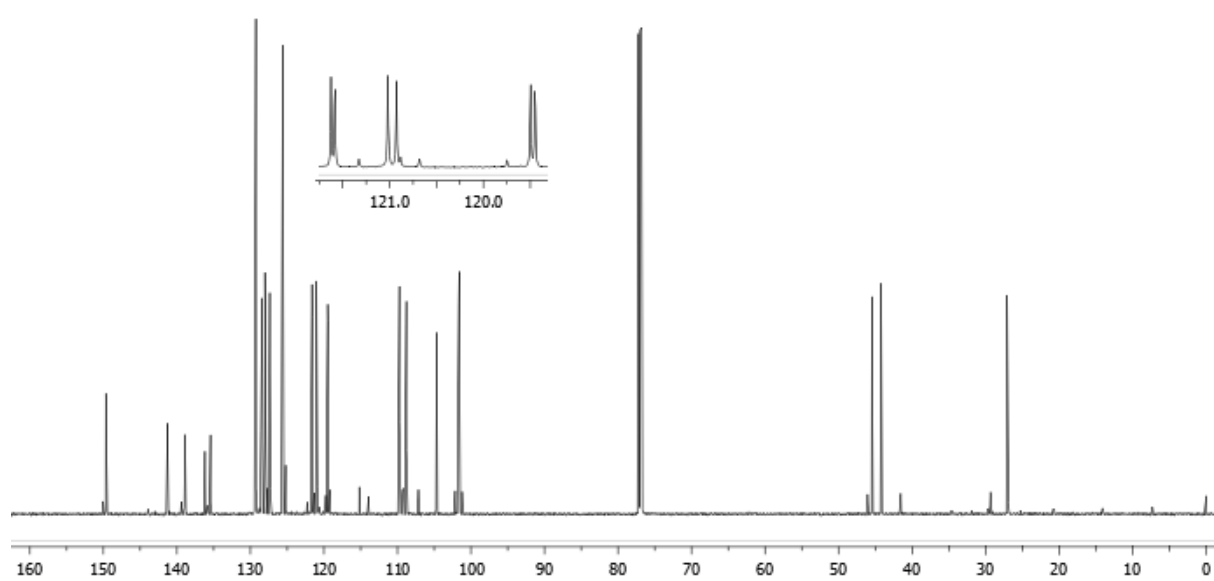

**Figure S30.** 150 MHz <sup>13</sup>C NMR spectrum of compound **5a** in CDCl<sub>3</sub>.

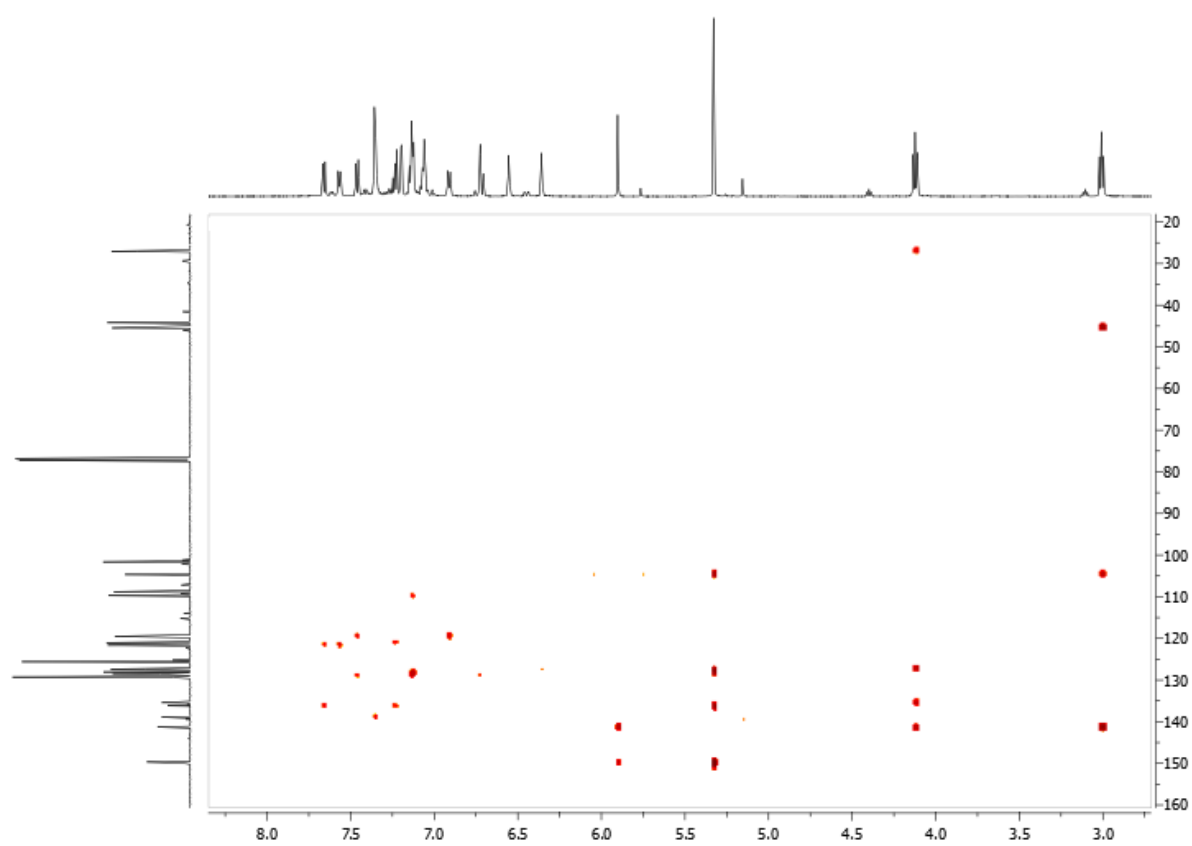

Figure S31. HMBC spectrum of compound **5a** in  $\text{CDCl}_3$ .

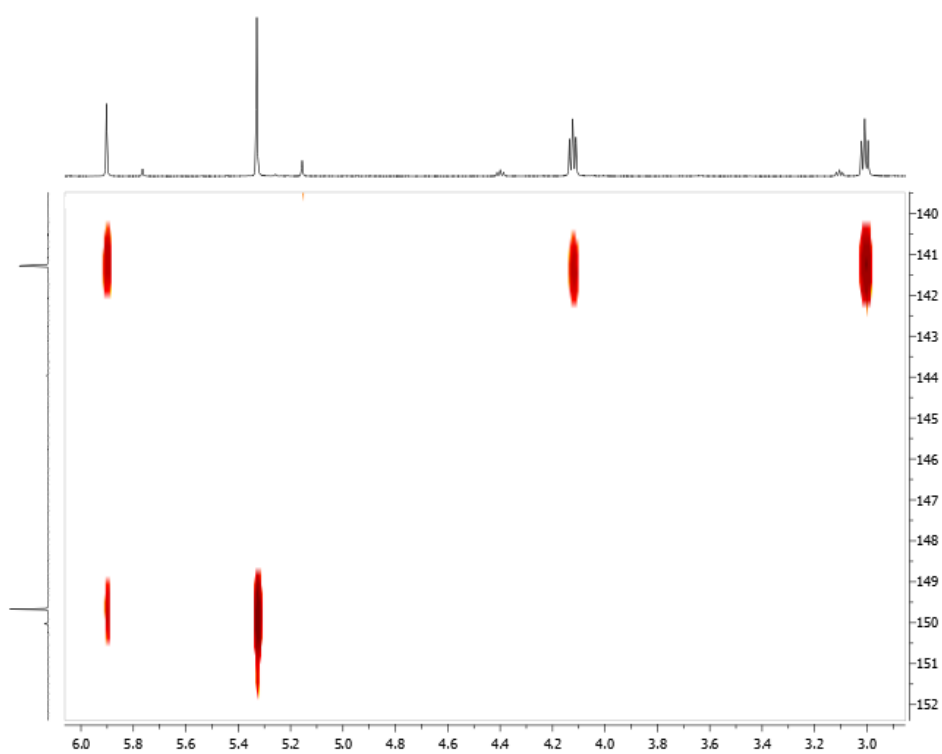

Figure S32. Expansion of the HMBC spectrum of compound **5a**.

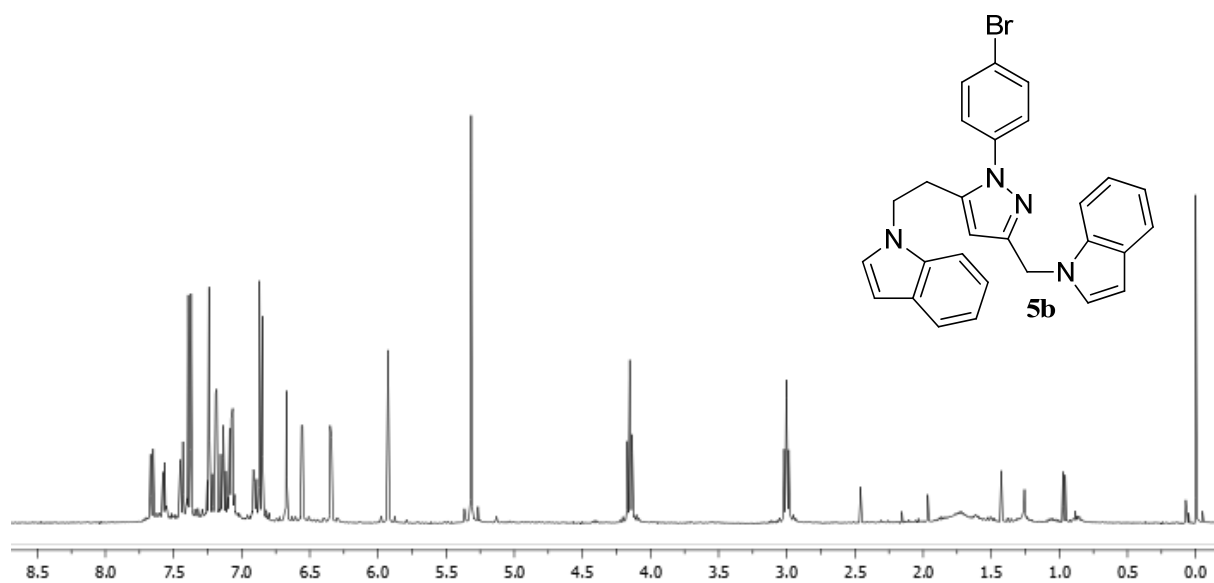

**Figure S33.** 400 MHz  $^1\text{H}$  NMR spectrum of compound **5b** in  $\text{CDCl}_3$ .

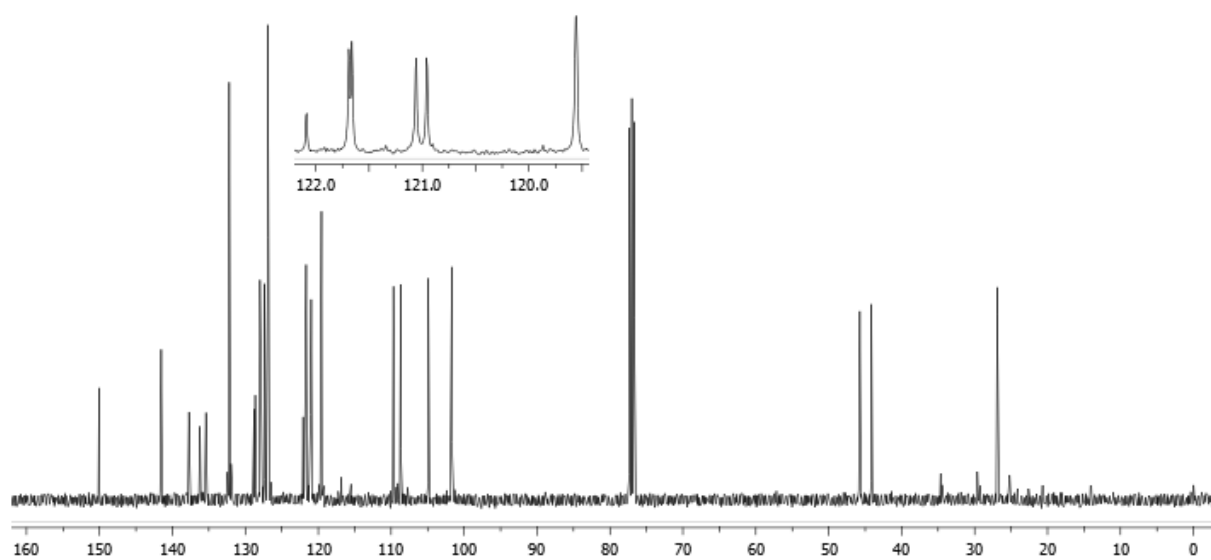

**Figure S34.** 100 MHz  $^{13}\text{C}$  NMR spectrum of compound **5b** in  $\text{CDCl}_3$ .

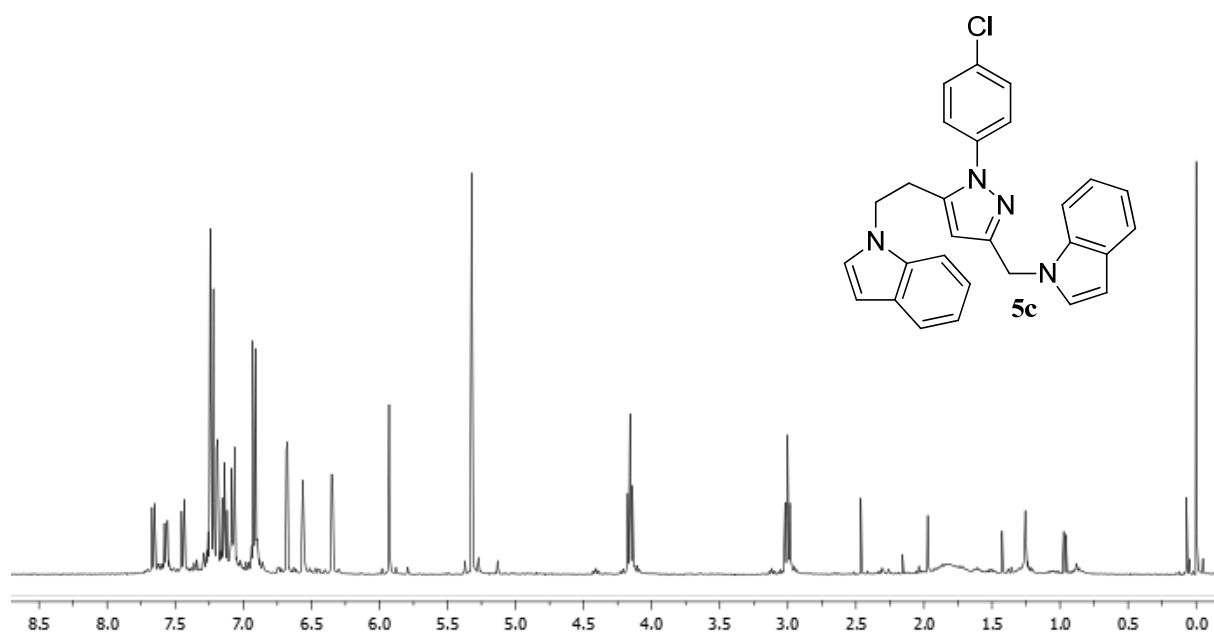

**Figure S35.** 400 MHz <sup>1</sup>H NMR spectrum of compound **5c** in CDCl<sub>3</sub>.

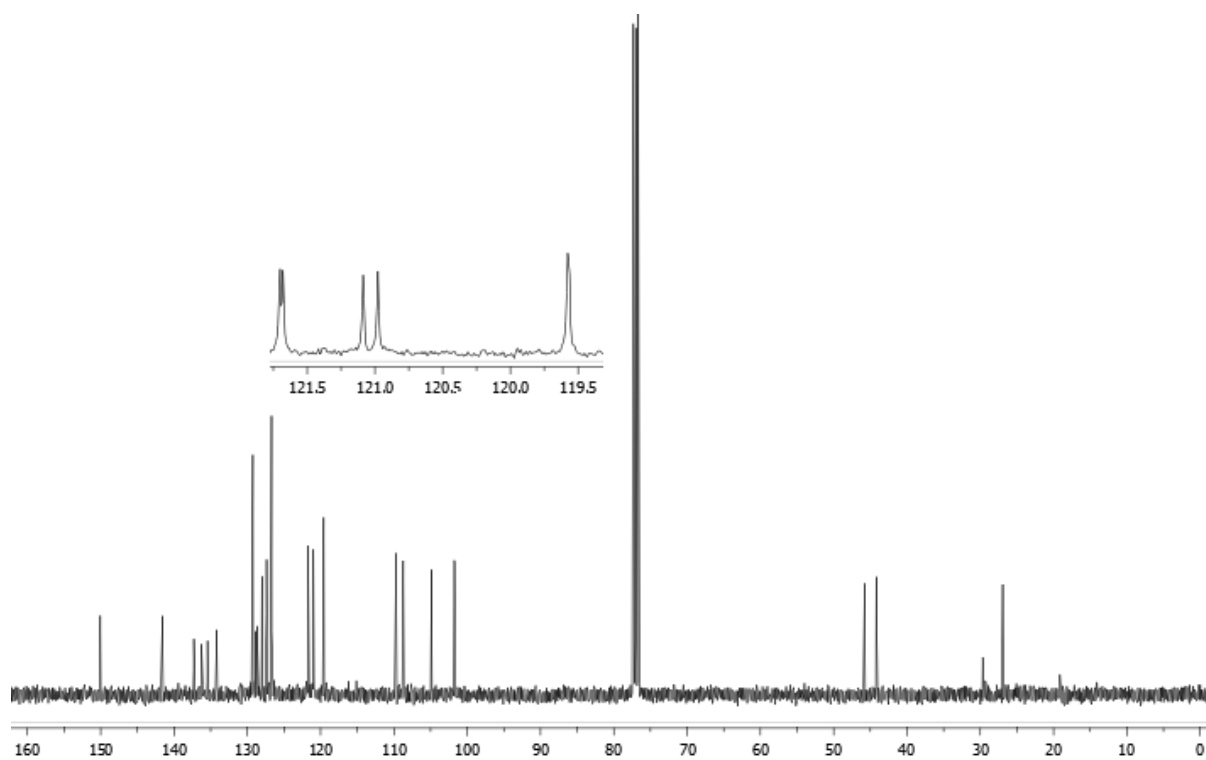

**Figure S36.** 100 MHz <sup>13</sup>C NMR spectrum of compound **5c** in CDCl<sub>3</sub>.



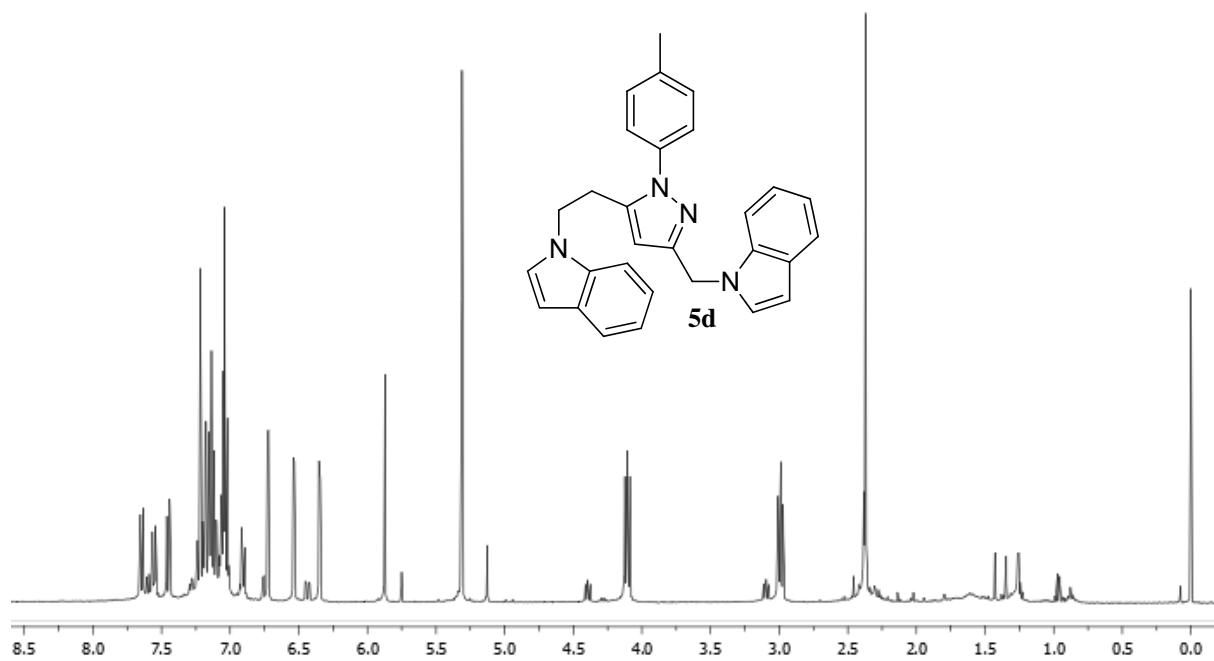

**Figure S37.** 400 MHz  $^1\text{H}$  NMR spectrum of compound **5d** in  $\text{CDCl}_3$ .

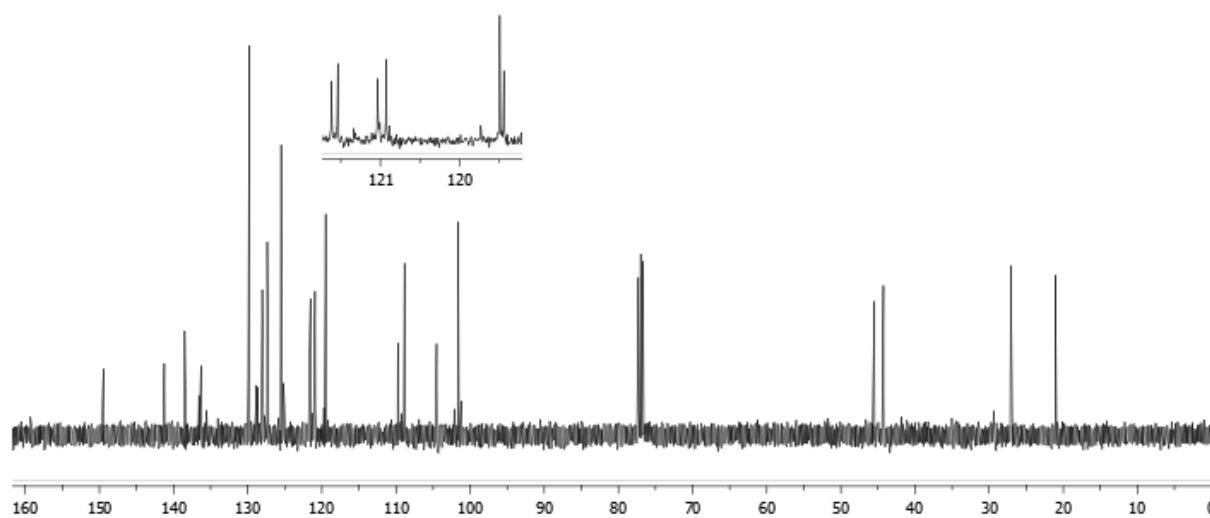

**Figure S38.** 100 MHz  $^{13}\text{C}$  NMR spectrum of compound **5d** in  $\text{CDCl}_3$ .

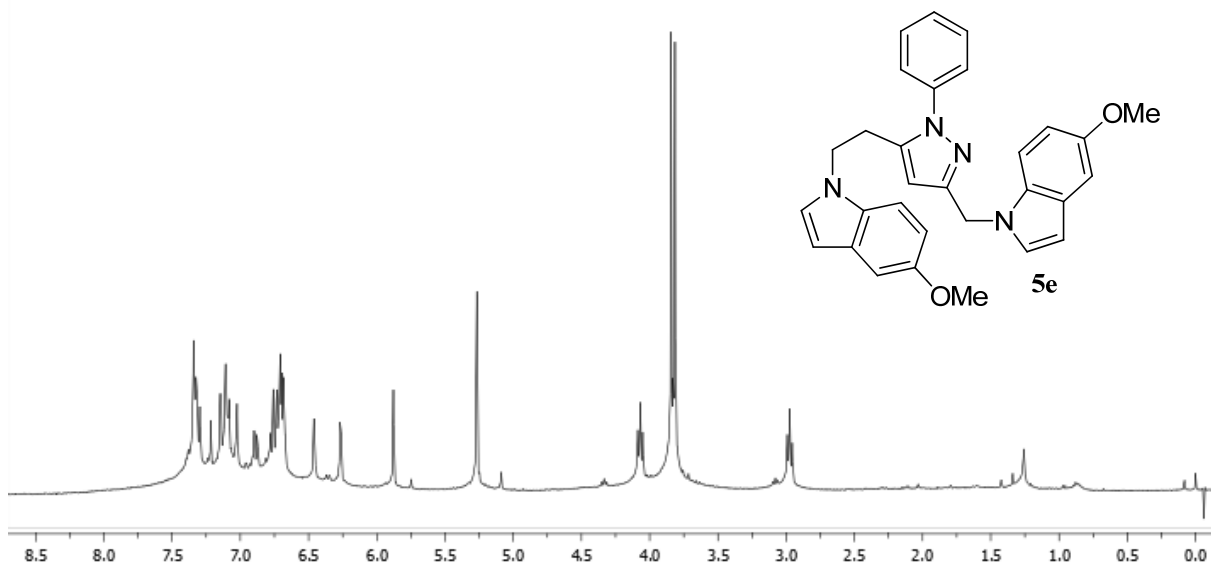

**Figure S39.** 400 MHz  $^1\text{H}$  NMR spectrum of compound **5e** in  $\text{CDCl}_3$ .

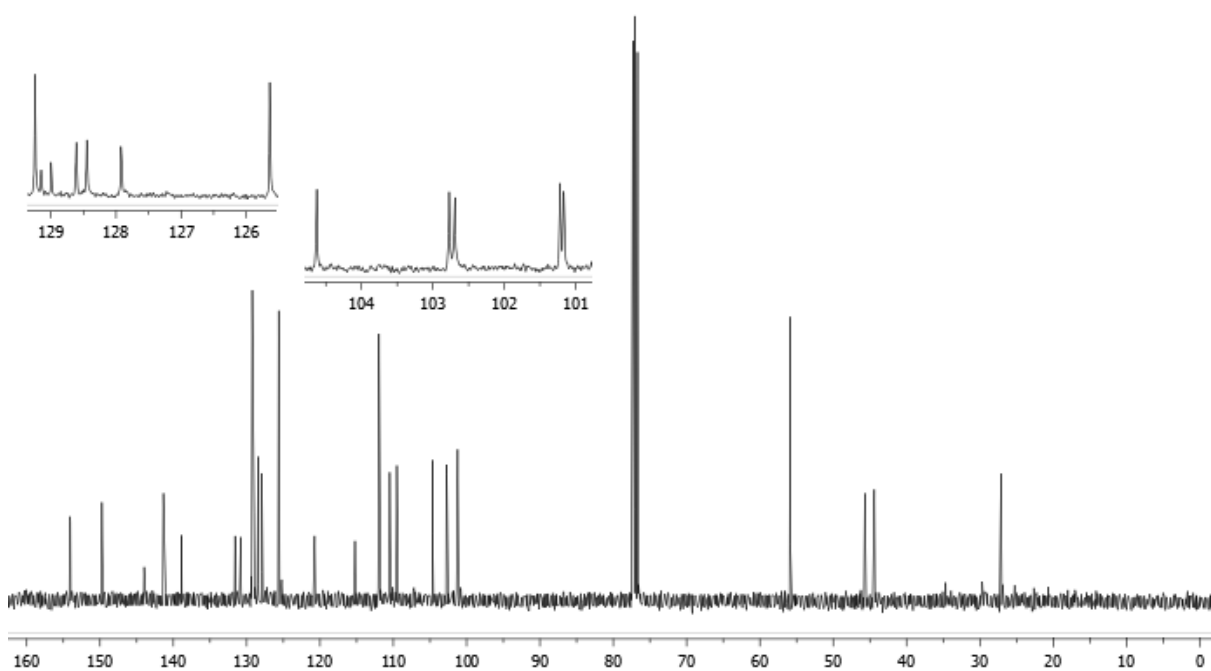

**Figure S40.** 100 MHz  $^{13}\text{C}$  NMR spectrum of compound **5e** in  $\text{CDCl}_3$ .

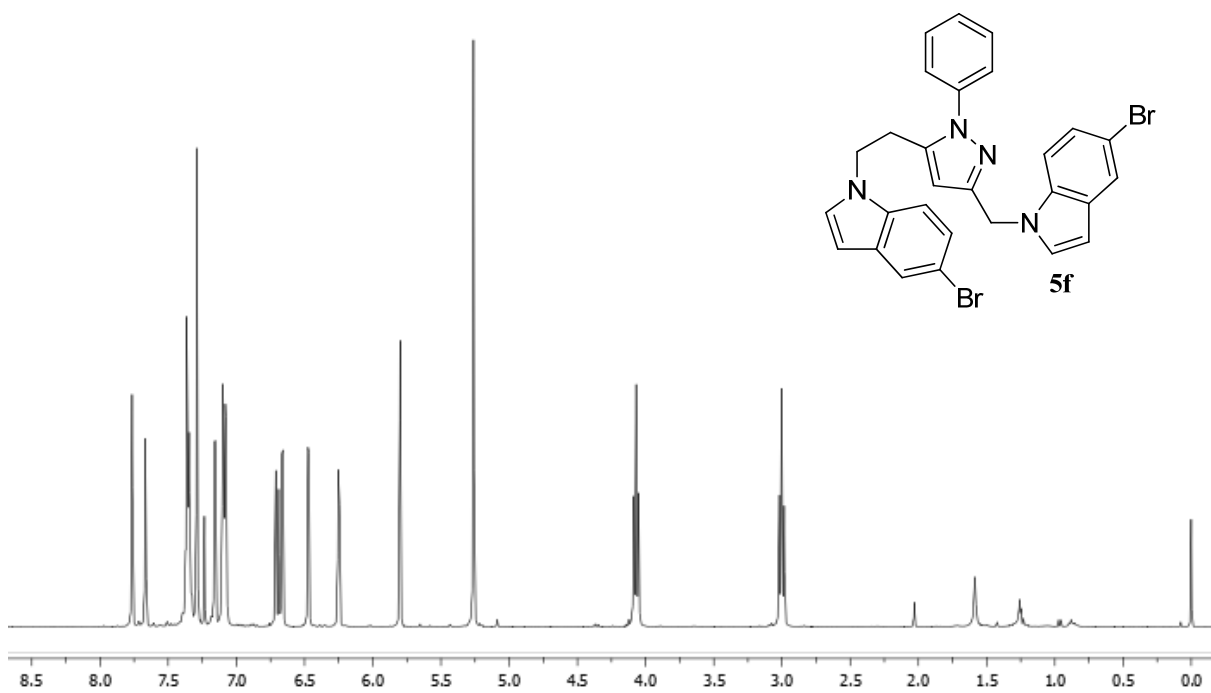

**Figure S41.** 400 MHz  $^1\text{H}$  NMR spectrum of compound **5f** in  $\text{CDCl}_3$ .

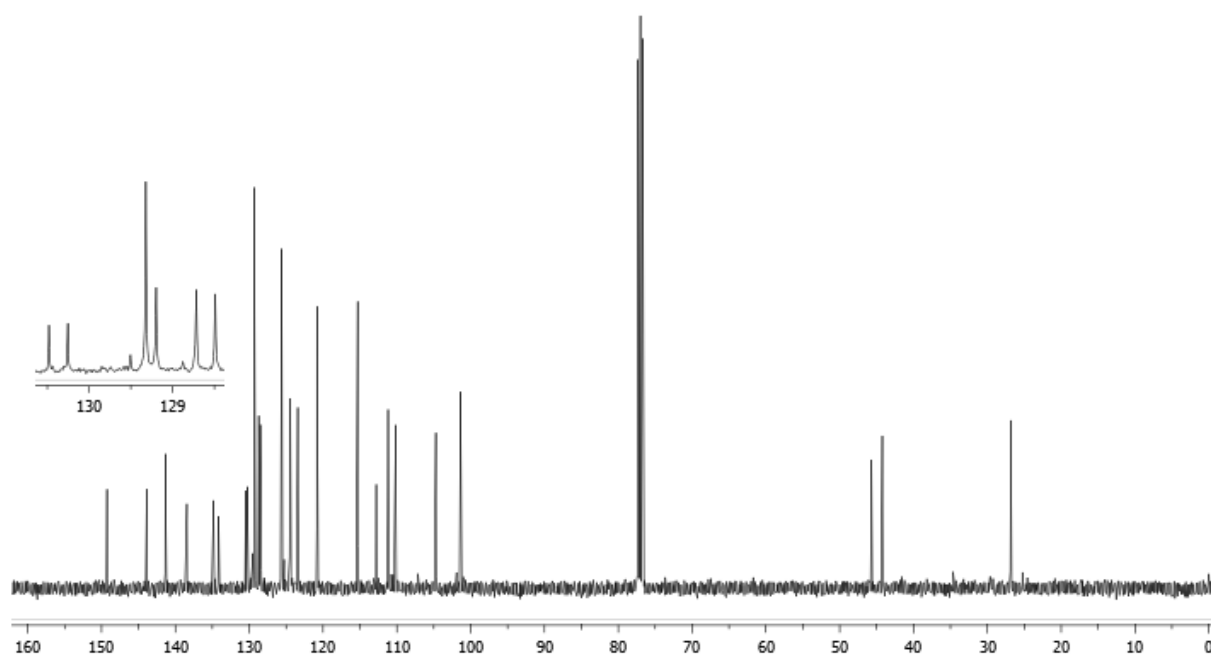

**Figure S42.** 100 MHz  $^{13}\text{C}$  NMR spectrum of compound **5f** in  $\text{CDCl}_3$ .

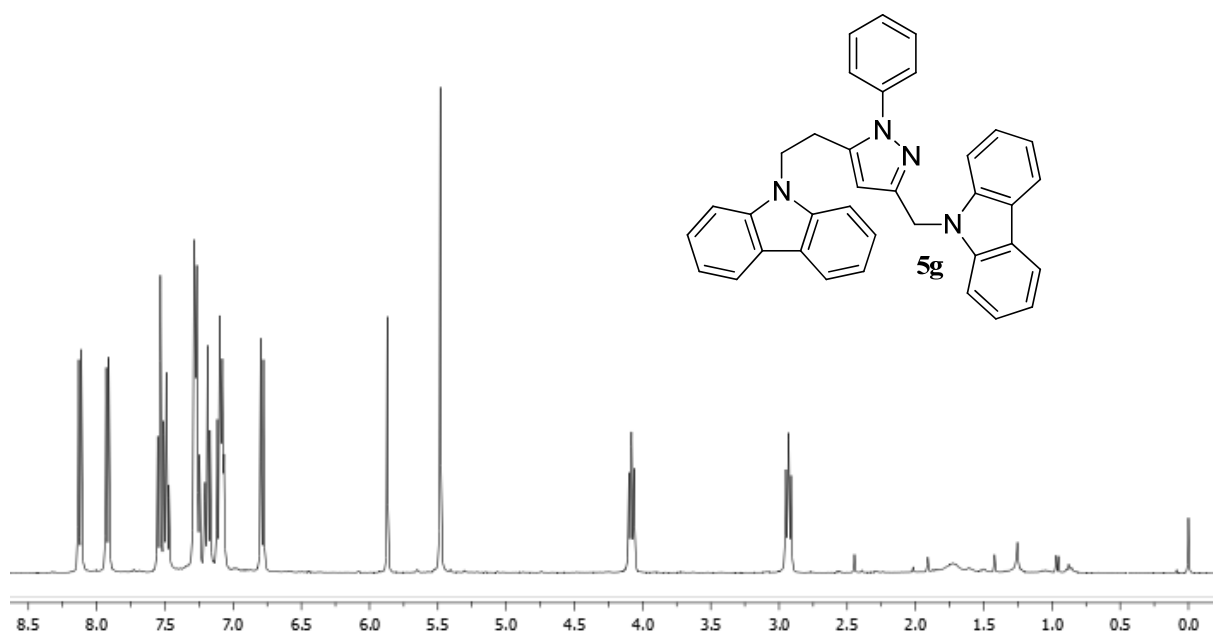

**Figure S43.** 400 MHz  $^1\text{H}$  NMR spectrum of compound **5g** in  $\text{CDCl}_3$ .

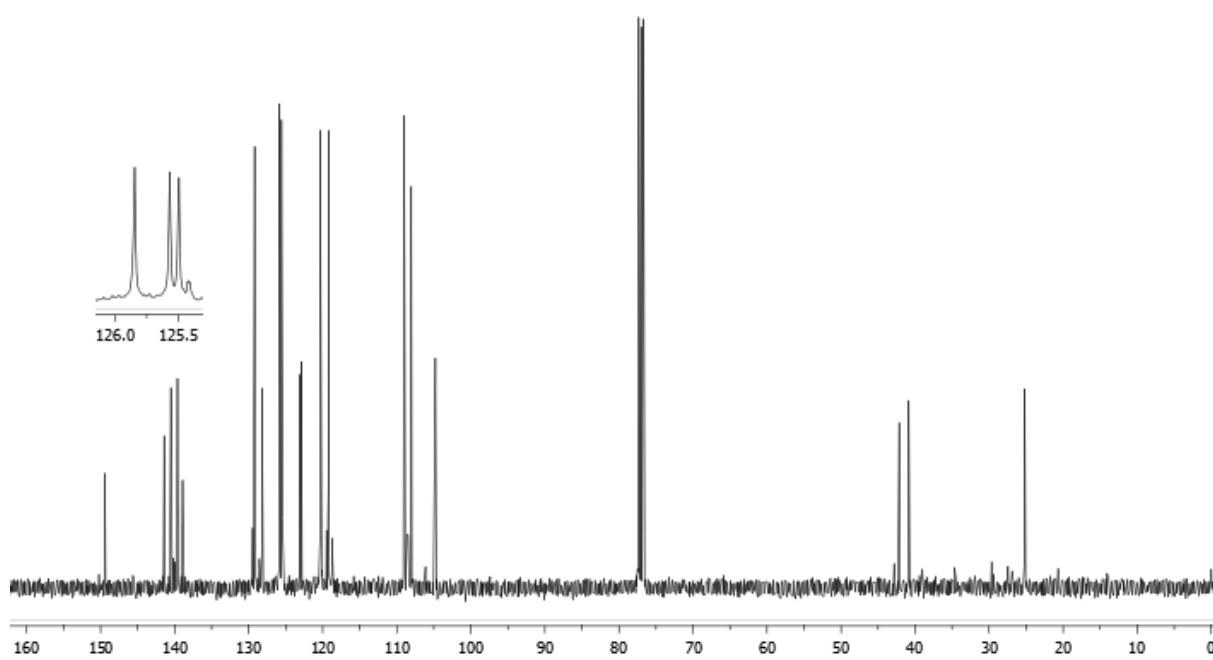

**Figure S44.** 100 MHz  $^{13}\text{C}$  NMR spectrum of compound **5g** in  $\text{CDCl}_3$ .

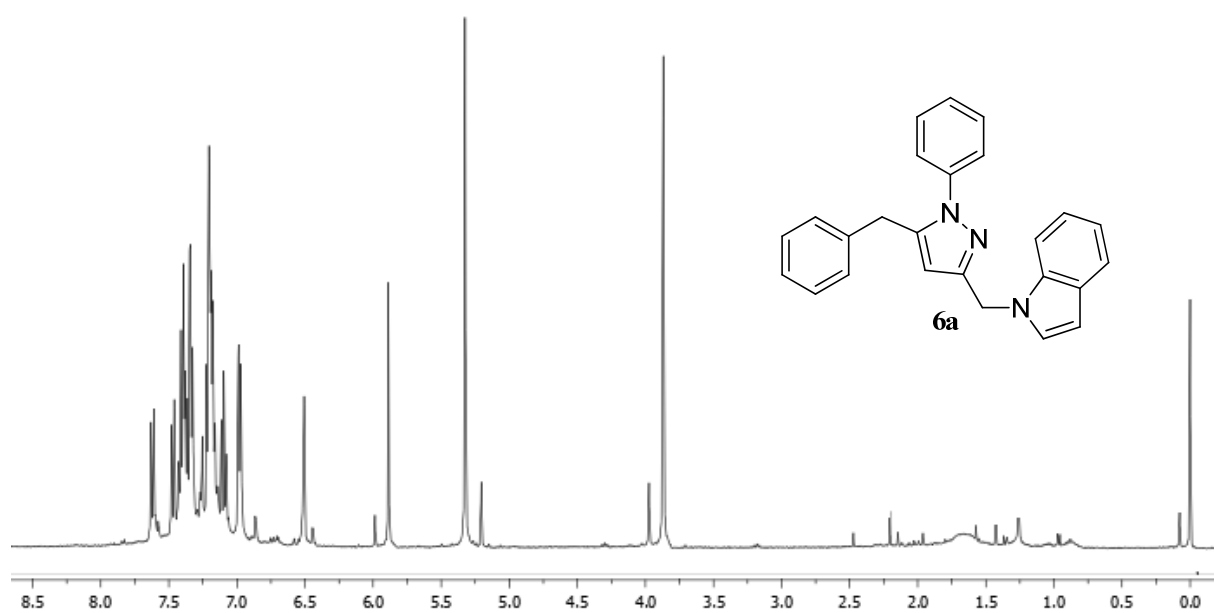

**Figure S45.** 400 MHz <sup>1</sup>H NMR spectrum of compound **6a** in CDCl<sub>3</sub>.

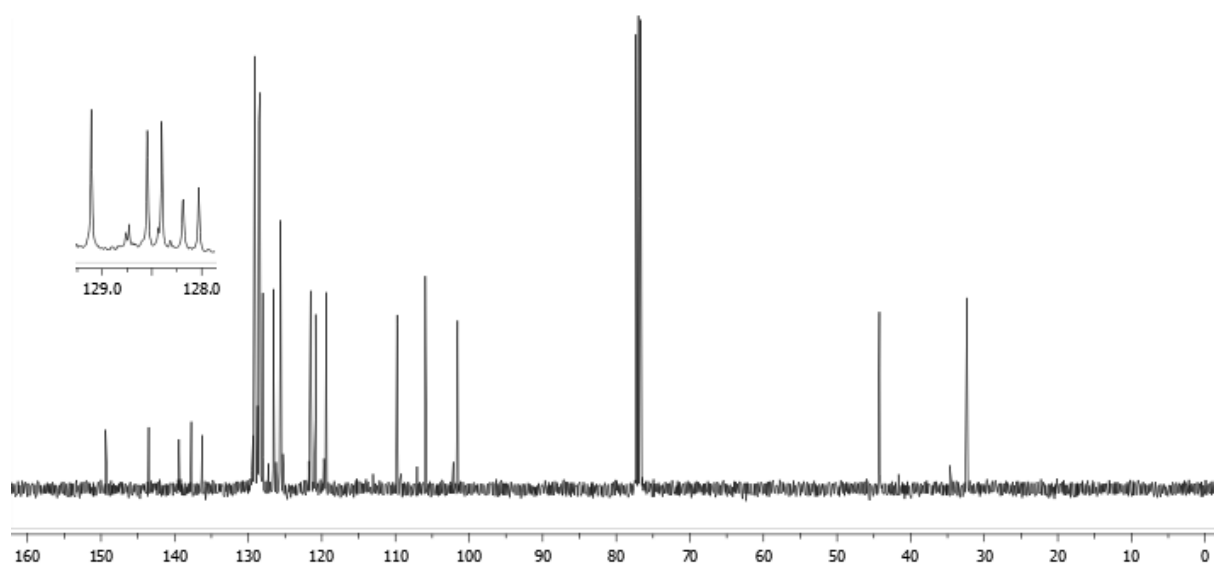

**Figure S46.** 100 MHz <sup>13</sup>C NMR spectrum of compound **6a** in CDCl<sub>3</sub>.

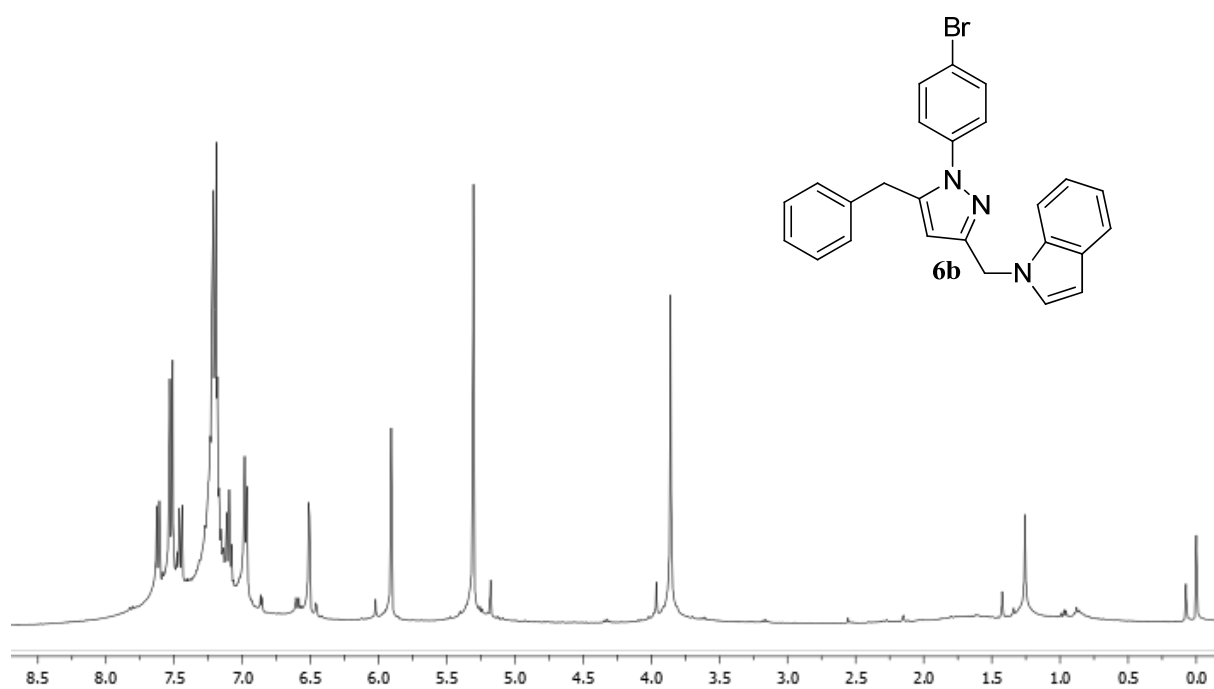

**Figure S47.** 400 MHz <sup>1</sup>H NMR spectrum of compound **6b** in CDCl<sub>3</sub>.

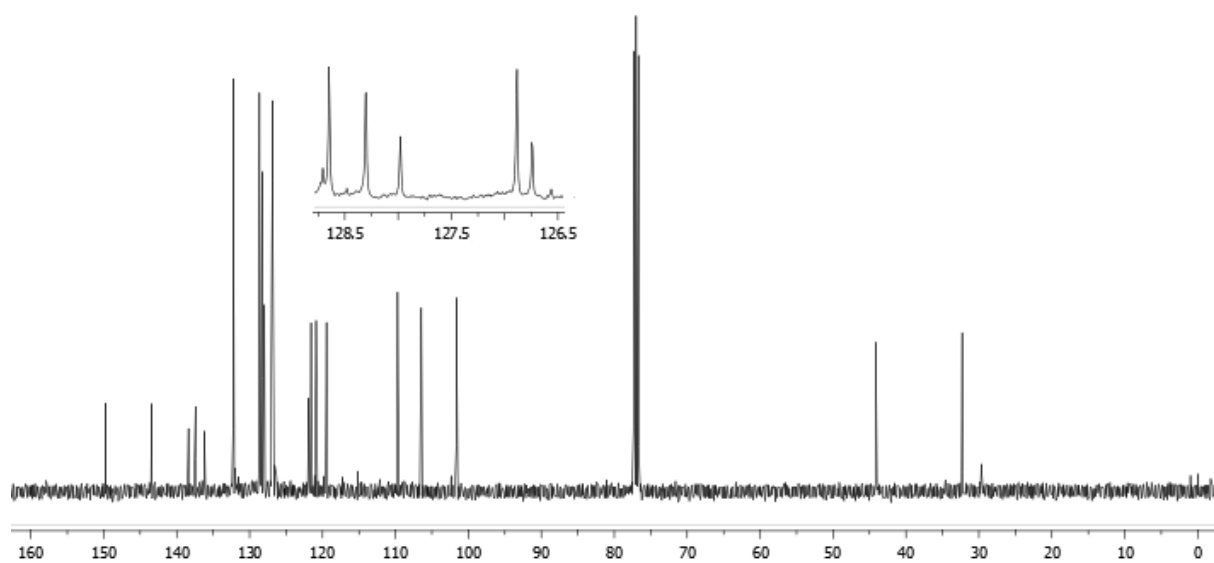

**Figure S48.** 100 MHz <sup>13</sup>C NMR spectrum of compound **6b** in CDCl<sub>3</sub>.

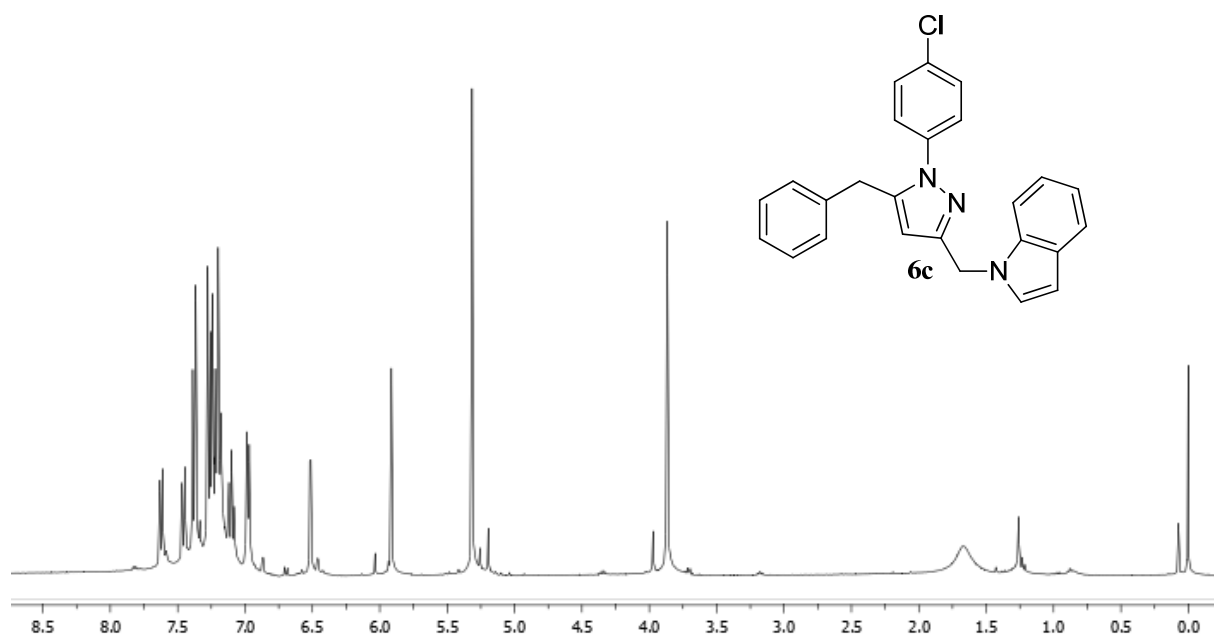

**Figure S49.** 400 MHz <sup>1</sup>H NMR spectrum of compound **6c** in CDCl<sub>3</sub>.

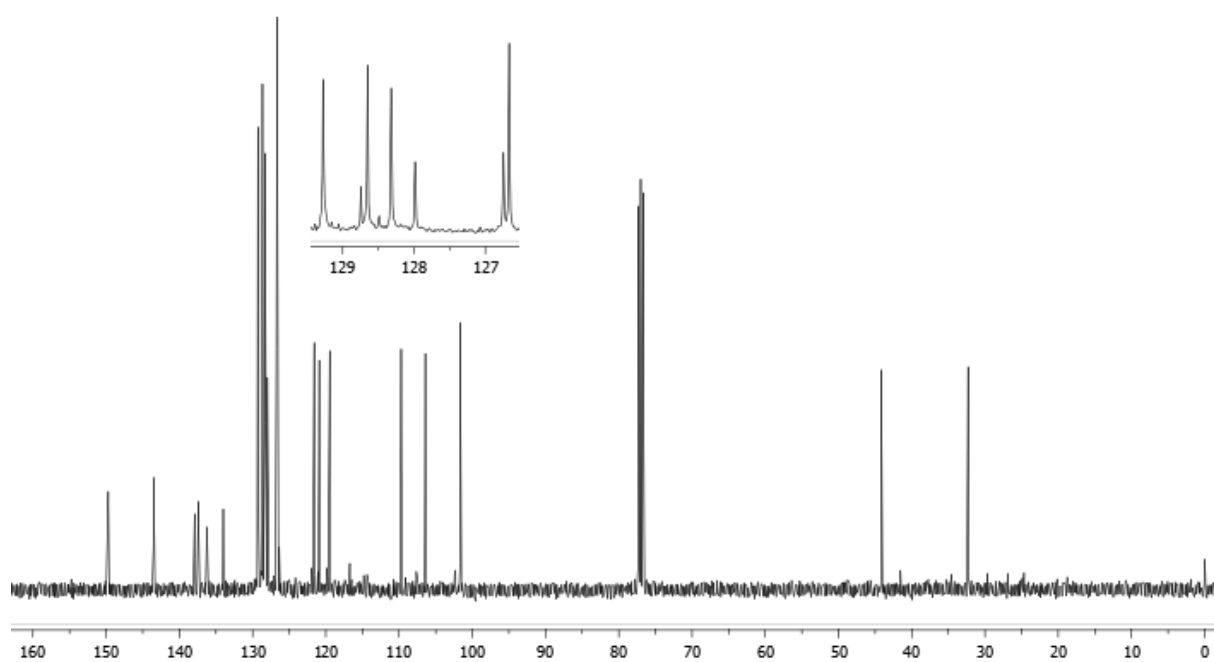

**Figure S50.** 100 MHz <sup>13</sup>C NMR spectrum of compound **6c** in CDCl<sub>3</sub>.

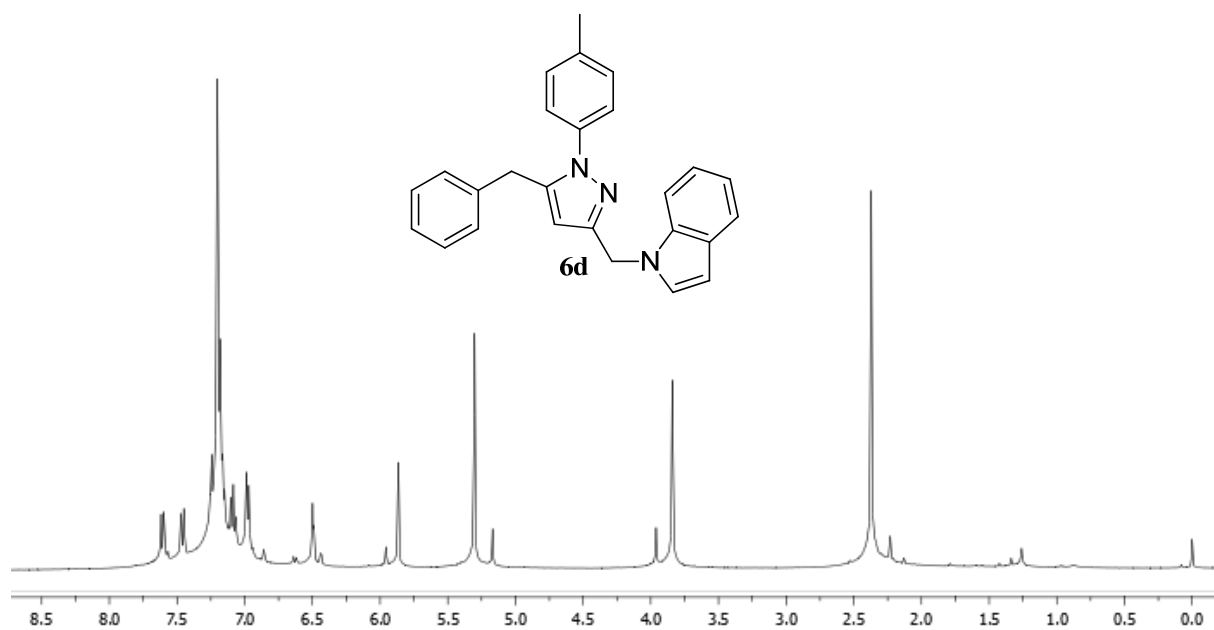

**Figure S51.** 400 MHz <sup>1</sup>H NMR spectrum of compound **6d** in CDCl<sub>3</sub>.

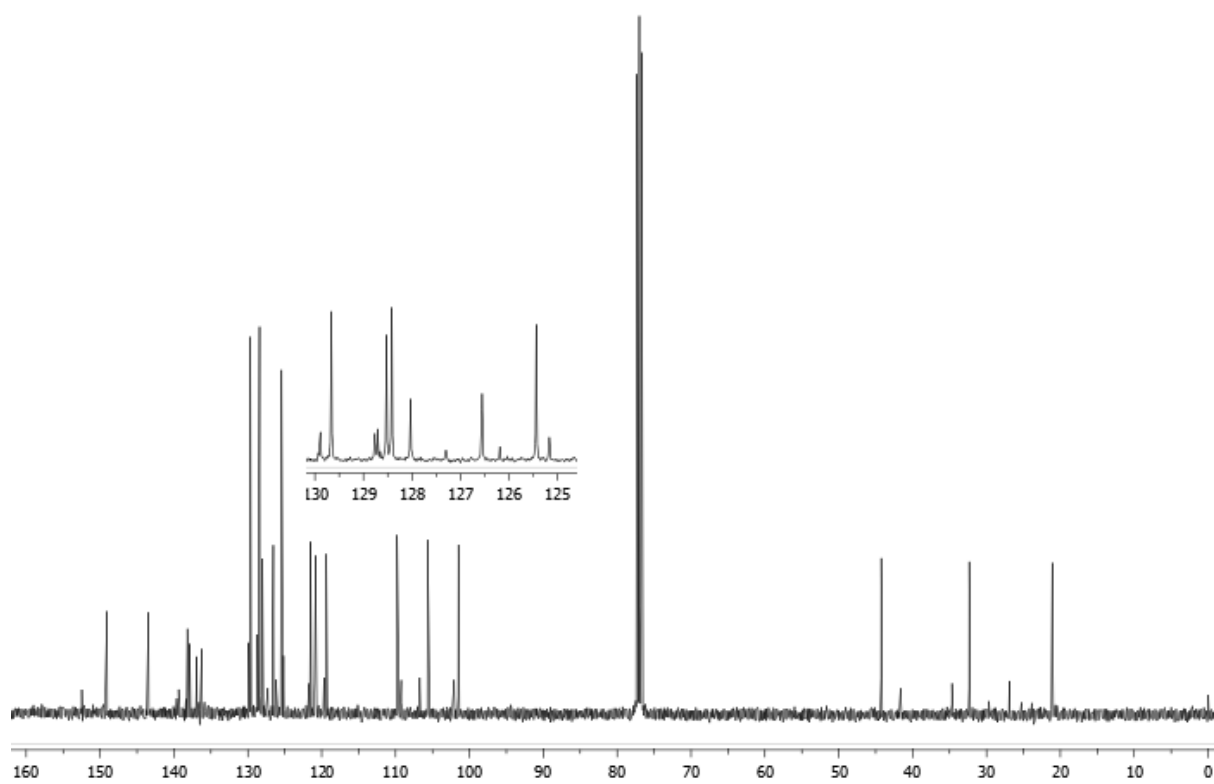

**Figure S52.** 100 MHz <sup>13</sup>C NMR spectrum of compound **6d** in CDCl<sub>3</sub>.



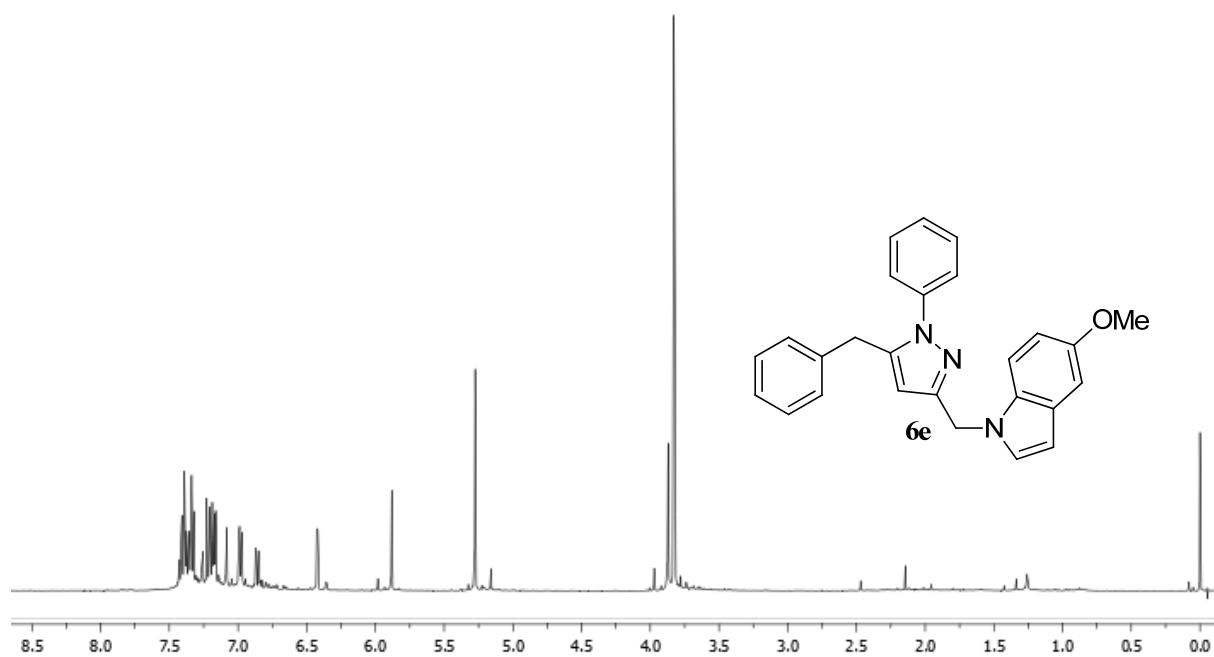

**Figure S53.** 400 MHz  $^1\text{H}$  NMR spectrum of compound **6e** in  $\text{CDCl}_3$ .

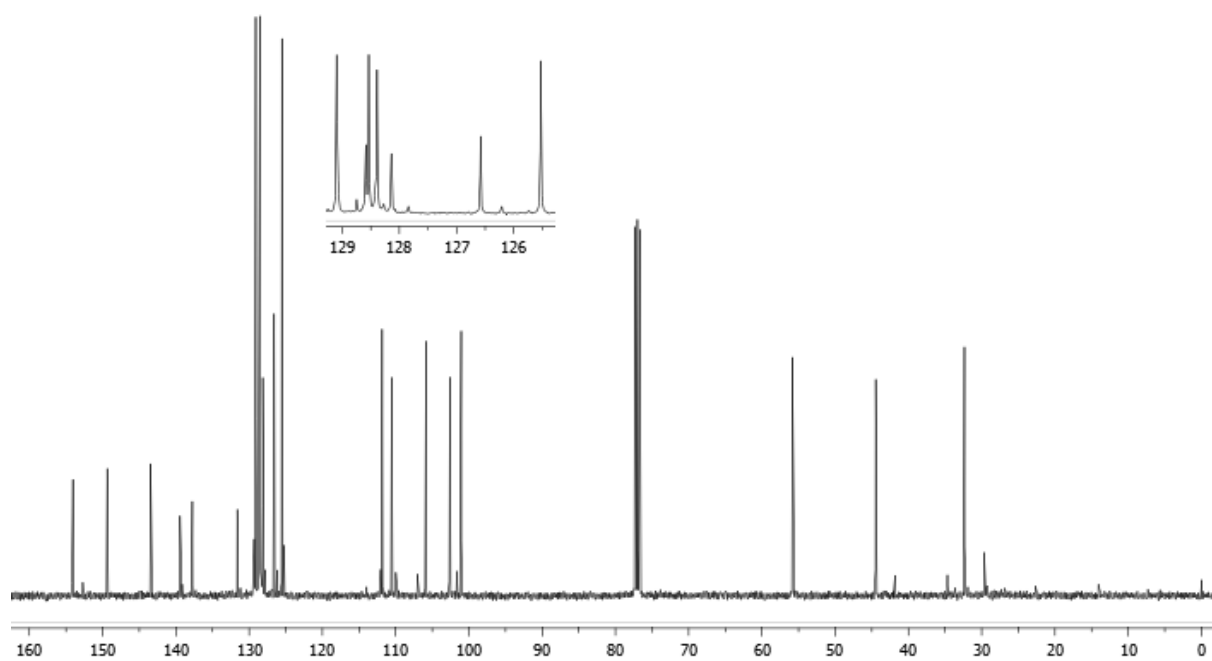

**Figure S54.** 100 MHz  $^{13}\text{C}$  NMR spectrum of compound **6e** in  $\text{CDCl}_3$ .

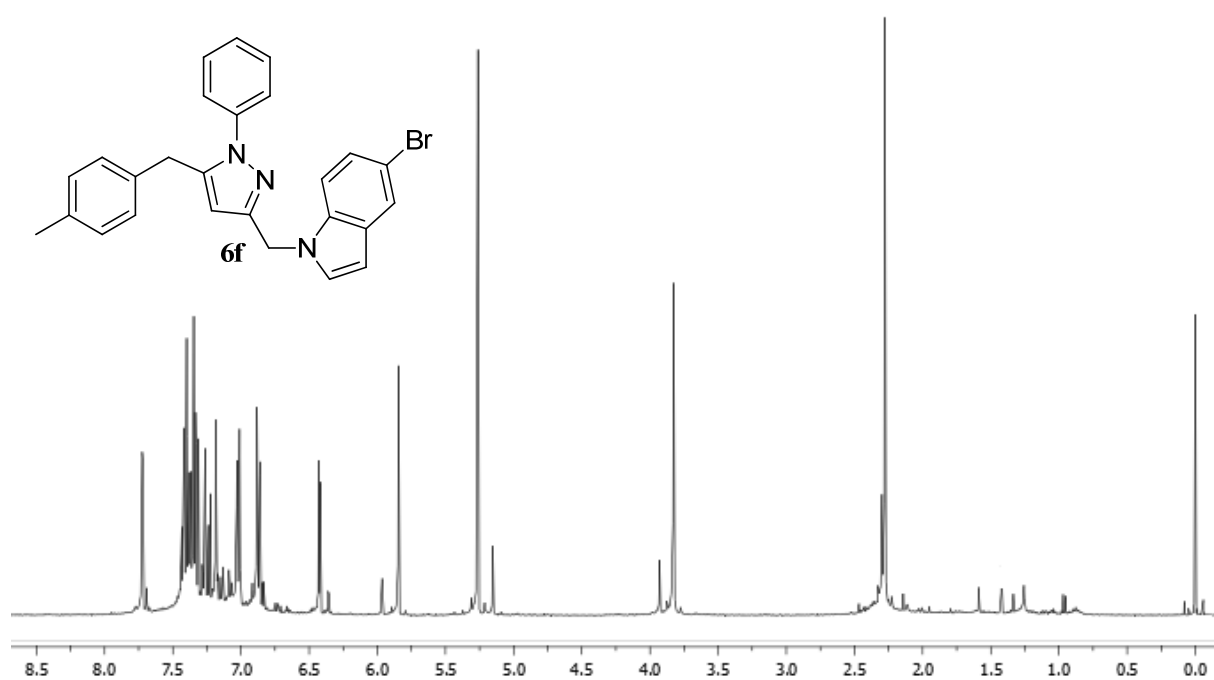

**Figure S55.** 400 MHz <sup>1</sup>H NMR spectrum of compound **6f** in CDCl<sub>3</sub>.

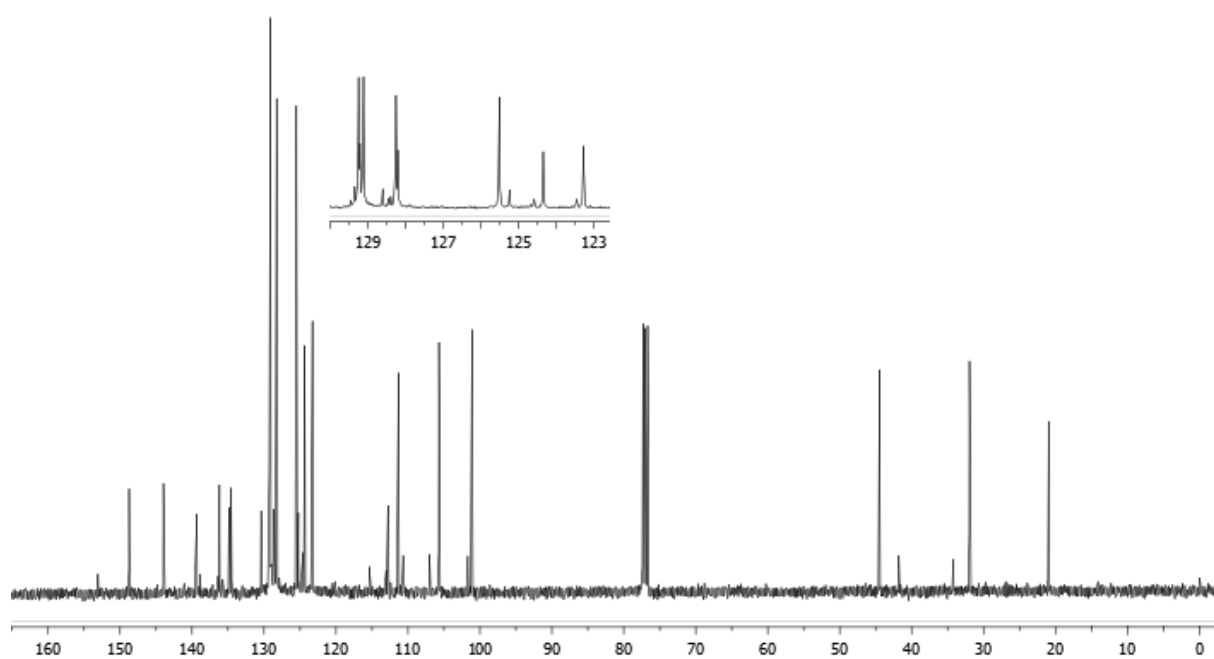

**Figure S56.** 100 MHz <sup>13</sup>C NMR spectrum of compound **6f** in CDCl<sub>3</sub>.

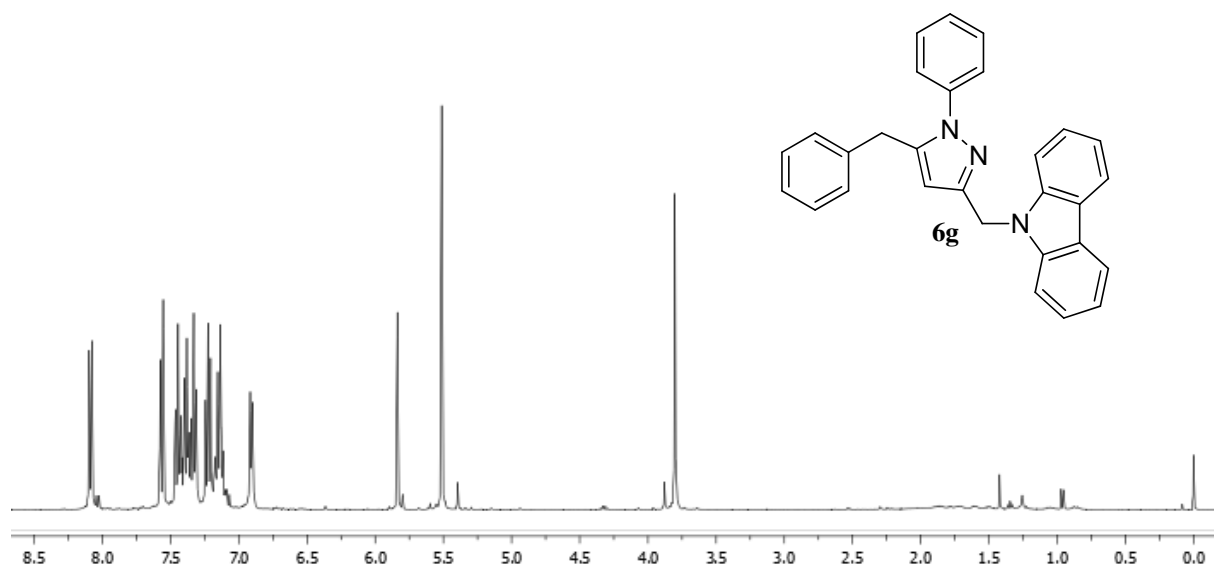

**Figure S57.** 400 MHz <sup>1</sup>H NMR spectrum of compound **6g** in CDCl<sub>3</sub>.

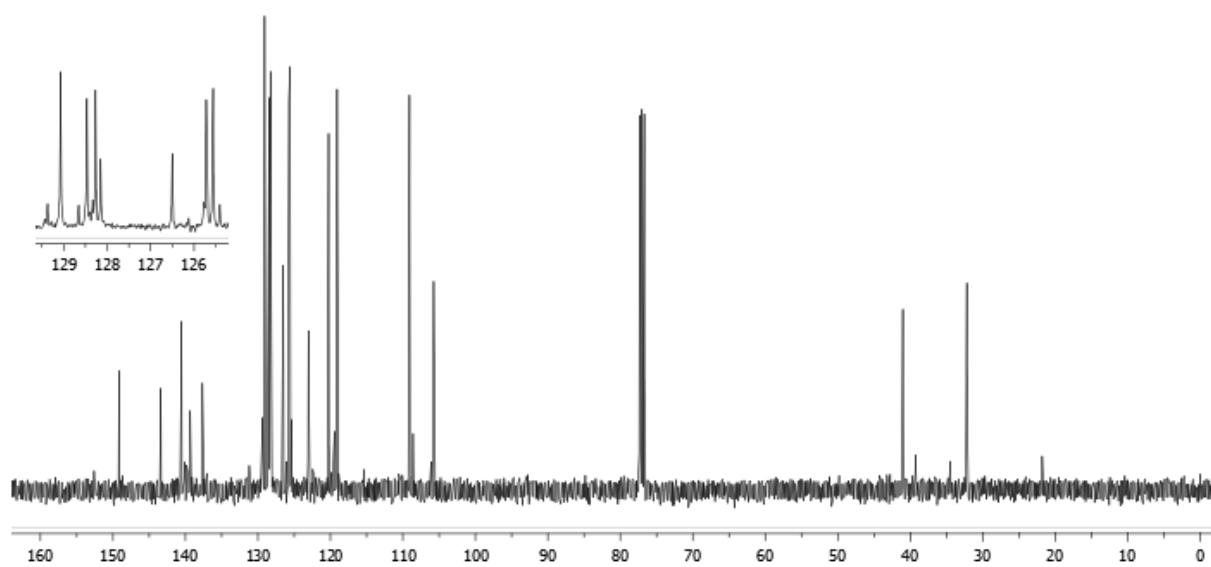

**Figure S58.** 100 MHz <sup>13</sup>C NMR spectrum of compound **6g** in CDCl<sub>3</sub>.
